# Supplementary material for: Author Correction: A selectable, plasmid-based system to generate CRISPR/Cas9 gene edited and knock-in mosquito cell lines
Source: PubMed Central journal article supplement (PMC8016948; doi:10.1038/s41598-021-87189-9), 2021-04-01
Supplement: 41598_2021_87189_MOESM1_ESM.pdf [file 41598_2021_87189_MOESM1_ESM.pdf]

**Supplementary Information for:**

**A selectable, plasmid-based system to generate CRISPR/Cas9 gene edited and knock-in mosquito cell lines**

Kathryn Rozen-Gagnon<sup>1\*</sup>, Soon Yi<sup>1</sup>, Eliana Jacobson<sup>1</sup>, Sasha Novack<sup>1</sup>, and Charles M. Rice<sup>1</sup>

<sup>1</sup>Laboratory of Virology and Infectious Disease, The Rockefeller University, New York, NY 10065, USA

\*Corresponding author: Kathryn Rozen-Gagnon. Phone (212) 327-7009. Fax (212) 327-7048. krozen@rockefeller.edu

## Supplementary Methods (all references are numbered as in the main text)

### CRISPR/Cas9 plasmid generation

To replace the *dme* *hsp70* promoter (*hsp70Bb*<sup>47,52</sup>) in pDCC6 with the *Ae. aegypti* polyubiquitin promoter (*aae PUb*<sup>15,32,54</sup>), an *AfeI* site was introduced by site-directed mutagenesis using the QuikChange II XL kit (Agilent) and oligos RU-O-22971 and RU-O-22972. The region containing the *AfeI* site was then cloned into a clean pDCC6 background by digestion of the parental pDCC6 and pDCC6-*AfeI* with flanking sites *SapI*/*AvrII* followed by ligation, transformation, and DNA isolation. *Aae PUb* with flanking *AfeI*/*AvrII* sites was amplified using RU-O-22977 and RU-O-22978 and Phusion polymerase (NEB) from the plasmid pSL1180-HR-PUB-ECFP<sup>15,32</sup> (a gift from Leslie Vosshall; Addgene plasmid # 47917; <http://n2t.net/addgene:47917>; RRID:Addgene\_47917). The resulting plasmid, pKRG2 (pKRG2-dU6-PUB-3xFLAG-hSpCas9), contains the *dme* U6-2 promoter (*Drosophila* Pol III promoter *U6:96Ab*<sup>47,48</sup>) and the *aae PUb* promoter driving expression of hSpCas9.

To replace the *dme* U6-2 promoter with the *Aae. aegypti* U6 promoter (*aae U6*; AAEL017774<sup>57</sup>), we had to alter the sgRNA cloning sites due to an internal *BbsI* site in the *aae U6*. We designed primers to add an overhang corresponding to the *aae U6* to a modified sgRNA cloning site that relies on *BsmBI* to the pKRG2 sgRNA tracrRNA (trans-activating CRISPR RNA) scaffold and terminator sequence, with a downstream *AfeI* site (RU-O-22974 and RU-O-22975). The scaffold PCR and a gBlocks Gene Fragment containing the *aae U6* sequence and an upstream *SacI* site were assembled by Gibson assembly. The assembled DNA was PCR amplified using primers RU-O-22975 and RU-O-22976. The *aae U6* insert and pKRG2 were digested with *SacI*/*AfeI*, ligated, and DNA was isolated to obtain pKRG3-mU6-PUB-3xFLAG-hSpCas9, which contains the *aae U6* promoter driving sgRNA expression and the *aae PUb* promoter driving expression of hSpCas9.

We additionally generated a version of this plasmid with the 3xFLAG at the beginning of the Cas9 removed. To remove the 3xFLAG, we introduced a *NcoI* site by site-directed mutagenesis using oligos RU-O-23100 and RU-O-23101. We then cloned this mutagenized insert into a clean pKRG3 background by restriction enzyme digest with *BglIII/XhoI*. The pKRG3-*NcoI* plasmid was then digested with *NcoI* to remove the 3xFLAG and re-ligated to generate pKRG3-mU6-PUB-hSpCas9. We made another variation with the puromycin resistance cassette (pAc) added. We amplified the end of Cas9, the intervening T2A sequence<sup>59</sup>, and pAc from pAc-sgRNA-Cas9<sup>30</sup> (a gift from Ji-Long Liu; Addgene plasmid #49330; <http://n2t.net/addgene:49330>; RRID:Addgene\_49330) using primers RU-O-23782 and RU-O-23783. We then digested pKRG3 with *EagI/BsrGI* and generated pKRG3-mU6-PUB-hSpCas9-pAc by Gibson assembly. For comparative purposes, we also removed the 3xFLAG and added the pAc to hSpCas9 in pKRG3 by the same method, generating pKRG2-dU6-PUB-hSpCas9-pAc.

### 3xFLAG-tagged AGO1 plasmid generation

To generate overexpression plasmids as positive controls for mosquito AGO1 immunoblotting, the pKRG3 plasmid was further modified. Aag2 N-terminal 3xFLAG-tagged short and long AGO1 isoforms and the U4.4 N-terminal 3xFLAG-tagged AGO1 with pKRG3 plasmid overhangs were PCR-amplified from an in-house plasmid containing experimentally validated AGO1 sequences in each cell line (unpublished data). The hSpCas9 sequence was removed from pKRG3-mU6-PUB-hSpCas9-pAc by digestion with *NcoI/BsrGI* and AGO1 sequences were inserted by Gibson assembly. Alternatively, to generate an empty pKRG3 plasmid, the ends of the *NcoI/BsrGI*-digested plasmid were filled with T4 DNA polymerase (NEB) according to the manufacturer's protocol and blunt ends were re-ligated. Finally, the *aae U6* sequence was removed from pKRG3 Ago-containing or empty plasmids by digestion with *SapI/AfeI*; the ends were filled with T4 DNA polymerase and blunt ends were ligated. This generated an empty, all-purpose pKRG4-mPUB-pAc plasmid, as well as pKRG4-mPUB-3xFLAG-Aag2-AGO1-short-pAc, pKRG4-mPUB-3xFLAG-Aag2-AGO1-long-pAc, and pKRG4-mPUB-3xFLAG-U44-AGO1-pAc. To express Cre recombinase for excision of the fluorescent reporter between the loxP sites, Cre recombinase was amplified from pME66 (a gift from S. Sarbanes) using primers adding *SacI*/*AvrII* sites; the Cre insert and pKRG4-mPUB-pAc were digested with *SacI*/*AvrII* to generate pKRG4-mPUB-Cre-pAc.

### CRISPR guide RNA design and cloning

We designed CRISPR RNAs (crRNAs) corresponding to *AGO1*. For Aag2 cells, we used the *Ae. aegypti* AaegL3 genome assembly, AaegL3.3 annotations, AAEL012410 (at the time of the design this was the most updated

assembly; since that time the *Ae. albopictus* genome assembly has been released<sup>23</sup>, the *AGO1* gene ID remains the same and the updated *Ae. albopictus* gene annotation contains the correct *AGO1* transcriptional start site). For U4.4 cells, we used the *Ae. albopictus* AaloF1 assembly, AaloF1.2 annotations, *AALF020776*. We first confirmed the genomic sequence around the experimentally determined translational start site in each cell line (unpublished data from 5'RACE and cDNA sequencing). Aag2 and U4.4 cell genomic DNA was isolated using the DNeasy Blood & Tissue Kit (Qiagen) according to the manufacturer's protocol. Aag2 genomic DNA was amplified using primers RU-O-22776 and RU-O-22777, designed using the *Ae. aegypti* AaegL3 assembly, which has the correct annotated starting methionine. U4.4 genomic DNA was amplified using primers RU-O-22929 and RU-O-22931, designed using the *Ae. albopictus* AaloF1 assembly, where we could only identify a downstream methionine in 5'RACE experiments. Three guide oligos containing the *BsmBI* overhangs in pKRG3 plasmids were designed for each cell line based on protospacer adjacent motif (PAM) NGG sequences in close proximity to the starting methionine (RU-O-23427 to RU-O-23434, *Ae. aegypti*; RU-O-23456 to RU-O-23463, *Ae. albopictus*). The parent pKRG3-mU6-PUB-hSpCas9-pAc plasmid was digested with *BsmBI* and annealed oligos were ligated to generate 6 pKRG3 plasmids, one for each guide, according to protocols from Kistler et al., 2015 and Cornell's Stem Cell and Transgenic Core Facility (<https://transgenics.vertebrategenomics.cornell.edu/genome-editing.html>). These co-express the crRNA plus the tracrRNA as a single guide RNA (sgRNA), and hSpCas9.

#### *Cloning of homology-directed repair (HDR) donor template*

The pSL1180-HR-PUBeCFP plasmid was used as the backbone for cloning an HDR donor template. A 2kb homology arm fragment around the translational start site of *AGO1* in Aag2 cells was amplified from Aag2 genomic DNA using oligos RU-O-24703 and RU-O-24704, to add homology with the pSL1180-HR-PUBeCFP plasmid. We ordered a gBlocks Gene Fragment containing an inserted 3xFLAG-tag between the first methionine and the second amino acid of *AGO1*, with silent mutations to ablate the sgRNA PAM sites. The gBlock extended past *PpuMI/EagI* sites in the homology arm. Next, the homology arm was digested with *PpuMI/EagI* to drop out the central ~160 nt, generating 2 ~1kb homology fragments overlapping the gBlock. pSL1180-HR-PUBeCFP was digested with *NotI/EcoRI*, dropping out the PUB-eCFP, and the fragments were assembled to generate the intermediate plasmid pSL1180-HR-Aag2-3xFLAG-*AGO1*. Next, pSL1180-HR-Aag2-3xFLAG-*AGO1* was modified to add the loxP-PUB-RFP-loxP cassette, with overlaps corresponding to the upstream homology arm and downstream 3xFLAG-*AGO1* sequence. We generated four PCRs: PCR1) 5'HA-loxP primers = RU-O-25019 and RU-O-25020, template = pSL1180-HR-Aag2-3xFLAG-*AGO1* pSL1180-HR-Aag2-3xFLAG-*AGO1*); PCR2: loxP-PUB-RFP (primers= RU-O-25021 and RU-O-25022, template = pKRG3), PUB-RFP-loxP (primers = RU-O-25023 and RU-O-25024, template= pTRIPZ; Dharmacon), loxP-3xFLAG-3'HA (primers = RU-O-25027 and RU-O-25028, template = pSL1180-HR-Aag2-3xFLAG-*AGO1*). pSL1180-HR-Aag2-3xFLAG-*AGO1* was digested with *KpnI/PpuMI* and the fragments were assembled by Gibson assembly to generate pSL1180-HR-Aag2-loxP-PUB-RFP-loxP-3xFLAG-*AGO1*.

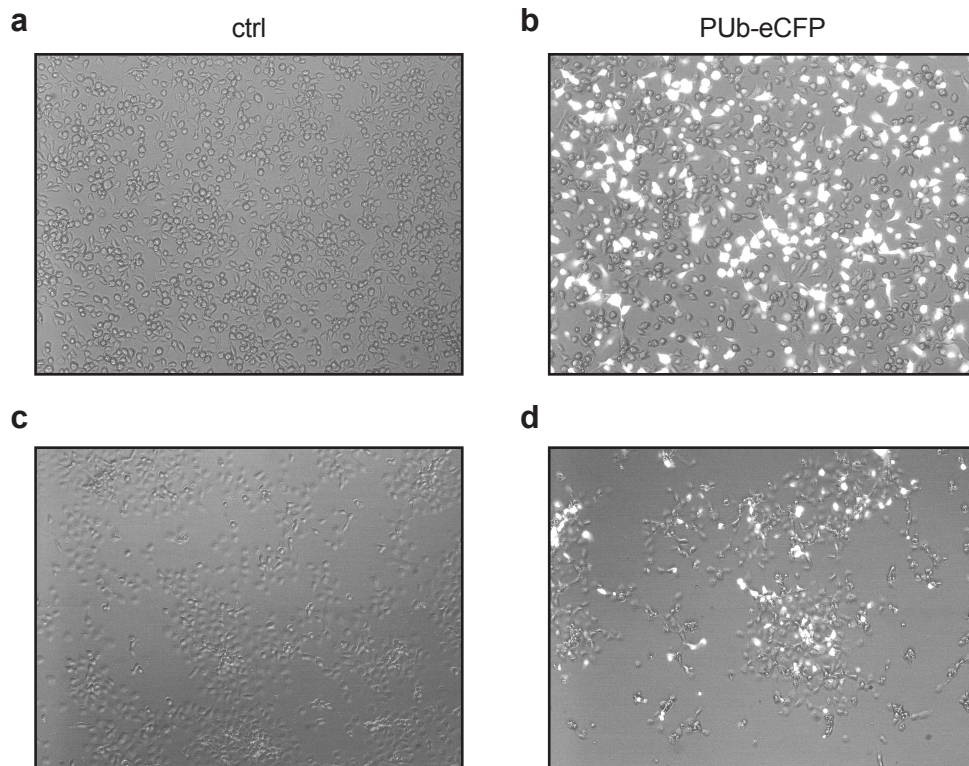

**Supplementary Figure 1. Efficient transfection of mosquito cells.**

(a) Representative merged brightfield and enhanced cyan fluorescent protein (eCFP) image for control (ctrl) U4.4 cells treated with transfection reagent alone.

(b) As in (a), for U4.4 cells transfected with PUB-eCFP.

(c) As in (a), for Aag2 cells.

(d) As in (b), for Aag2 cells.

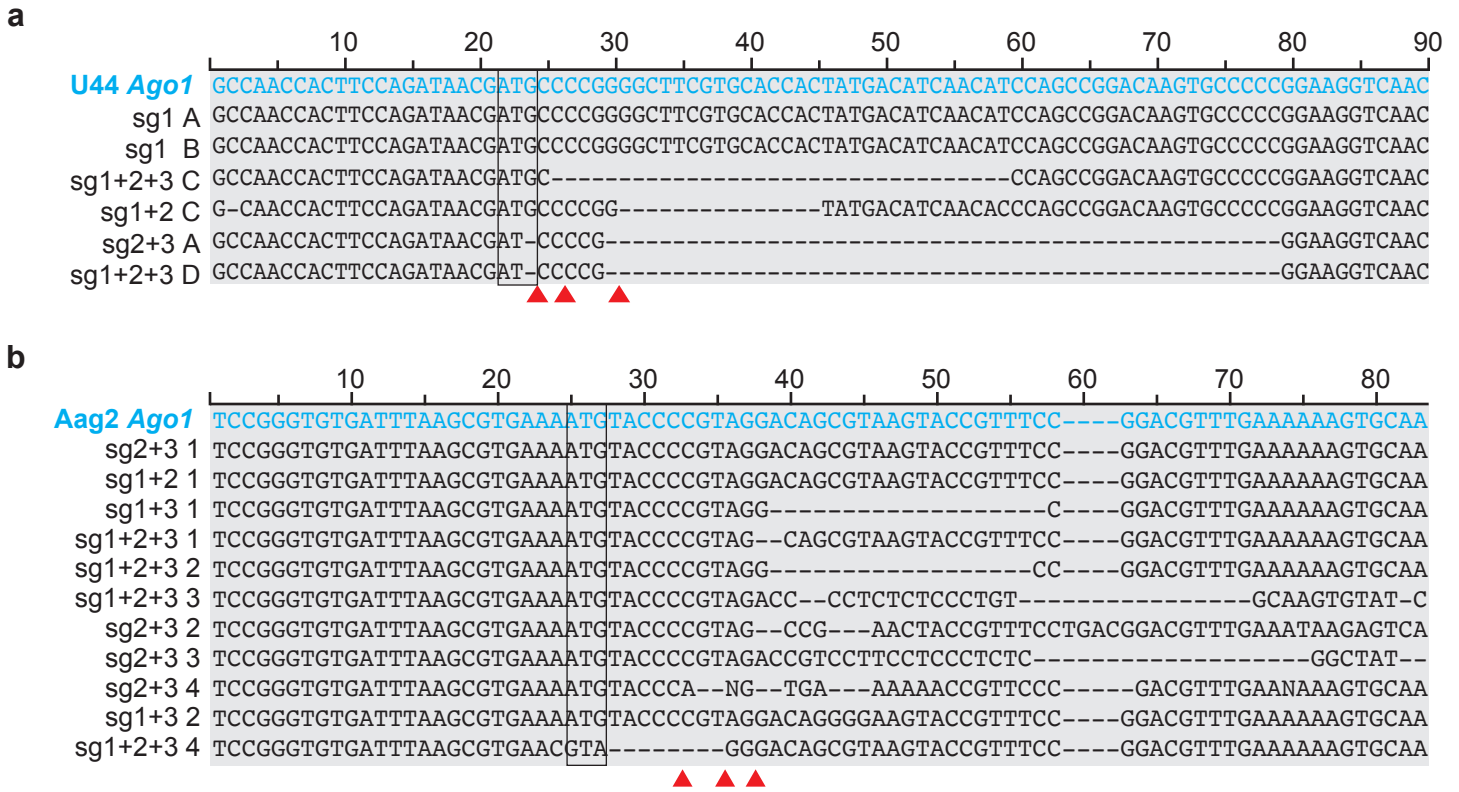

**Supplementary Figure 2. AGO1 sequences of single cell clones isolated after CRISPR/Cas9 transfection.**

(a) Representative alignment of AGO1 sequences from established U4.4 single cell clones. Clones were isolated and sequenced post-transfection with pKRG3 CRISPR/Cas9 plasmids containing guides targeting AGO1. sgRNA cleavage sites = red arrows; starting methionine = black box; reference sequence shown in blue.

(b) As in (a), for Aag2 cells.

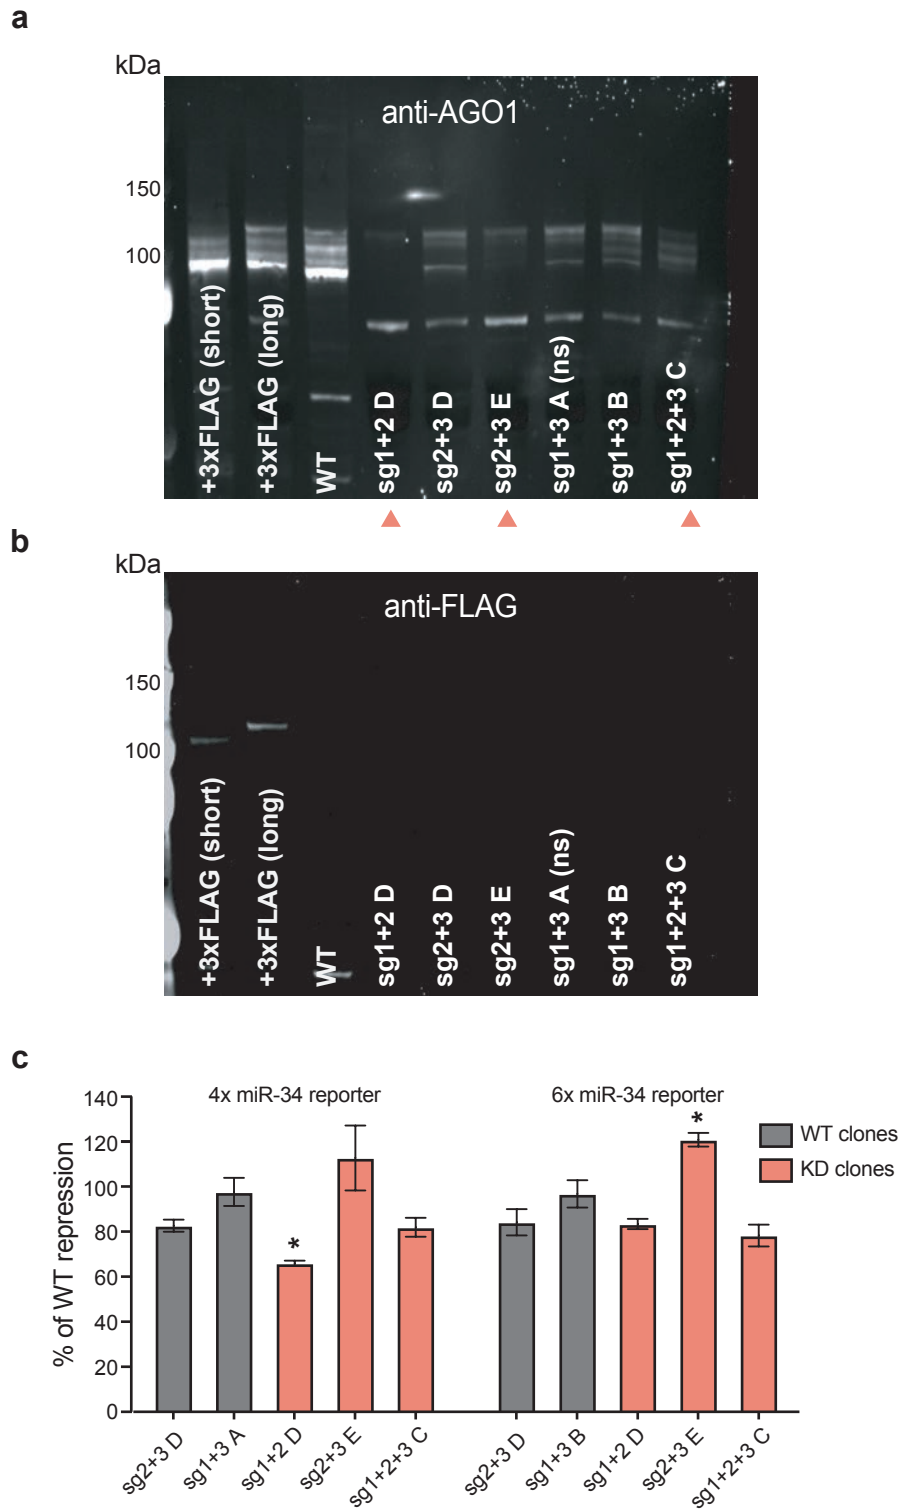

**Supplementary Figure 3. AGO1 protein levels and function in Aag2 clones.**

(a) Immunoblot of AGO1 showed Aag2 clones with wild-type (WT) and reduced (salmon arrows) AGO1 protein levels; A-E denote clones obtained from each sgRNA singly or in combination; ns = not shown (in reporter assay).

(b) 3xFLAG-tagged Aag2 AGO1 short and long isoforms were expressed and were detected by both the anti-AGO1 antibody in (a) and the anti-FLAG antibody.

(c) Luciferase reporter assay measuring miR-34 mediated repression of 4 or 6 repeated miR-34 sites (4x, 6x miR-34 reporter). Normalization was performed as in Fig. 3e. The percent (%) of repression compared to WT clones sg2+3 D and sg1+3 A is shown.  $P < 0.0001$  (overall ANOVA comparing different clones); individual groups were compared using the Dunnett's *post hoc* test compared to the WT clone sg1+3 B; \* $P < 0.05$ .

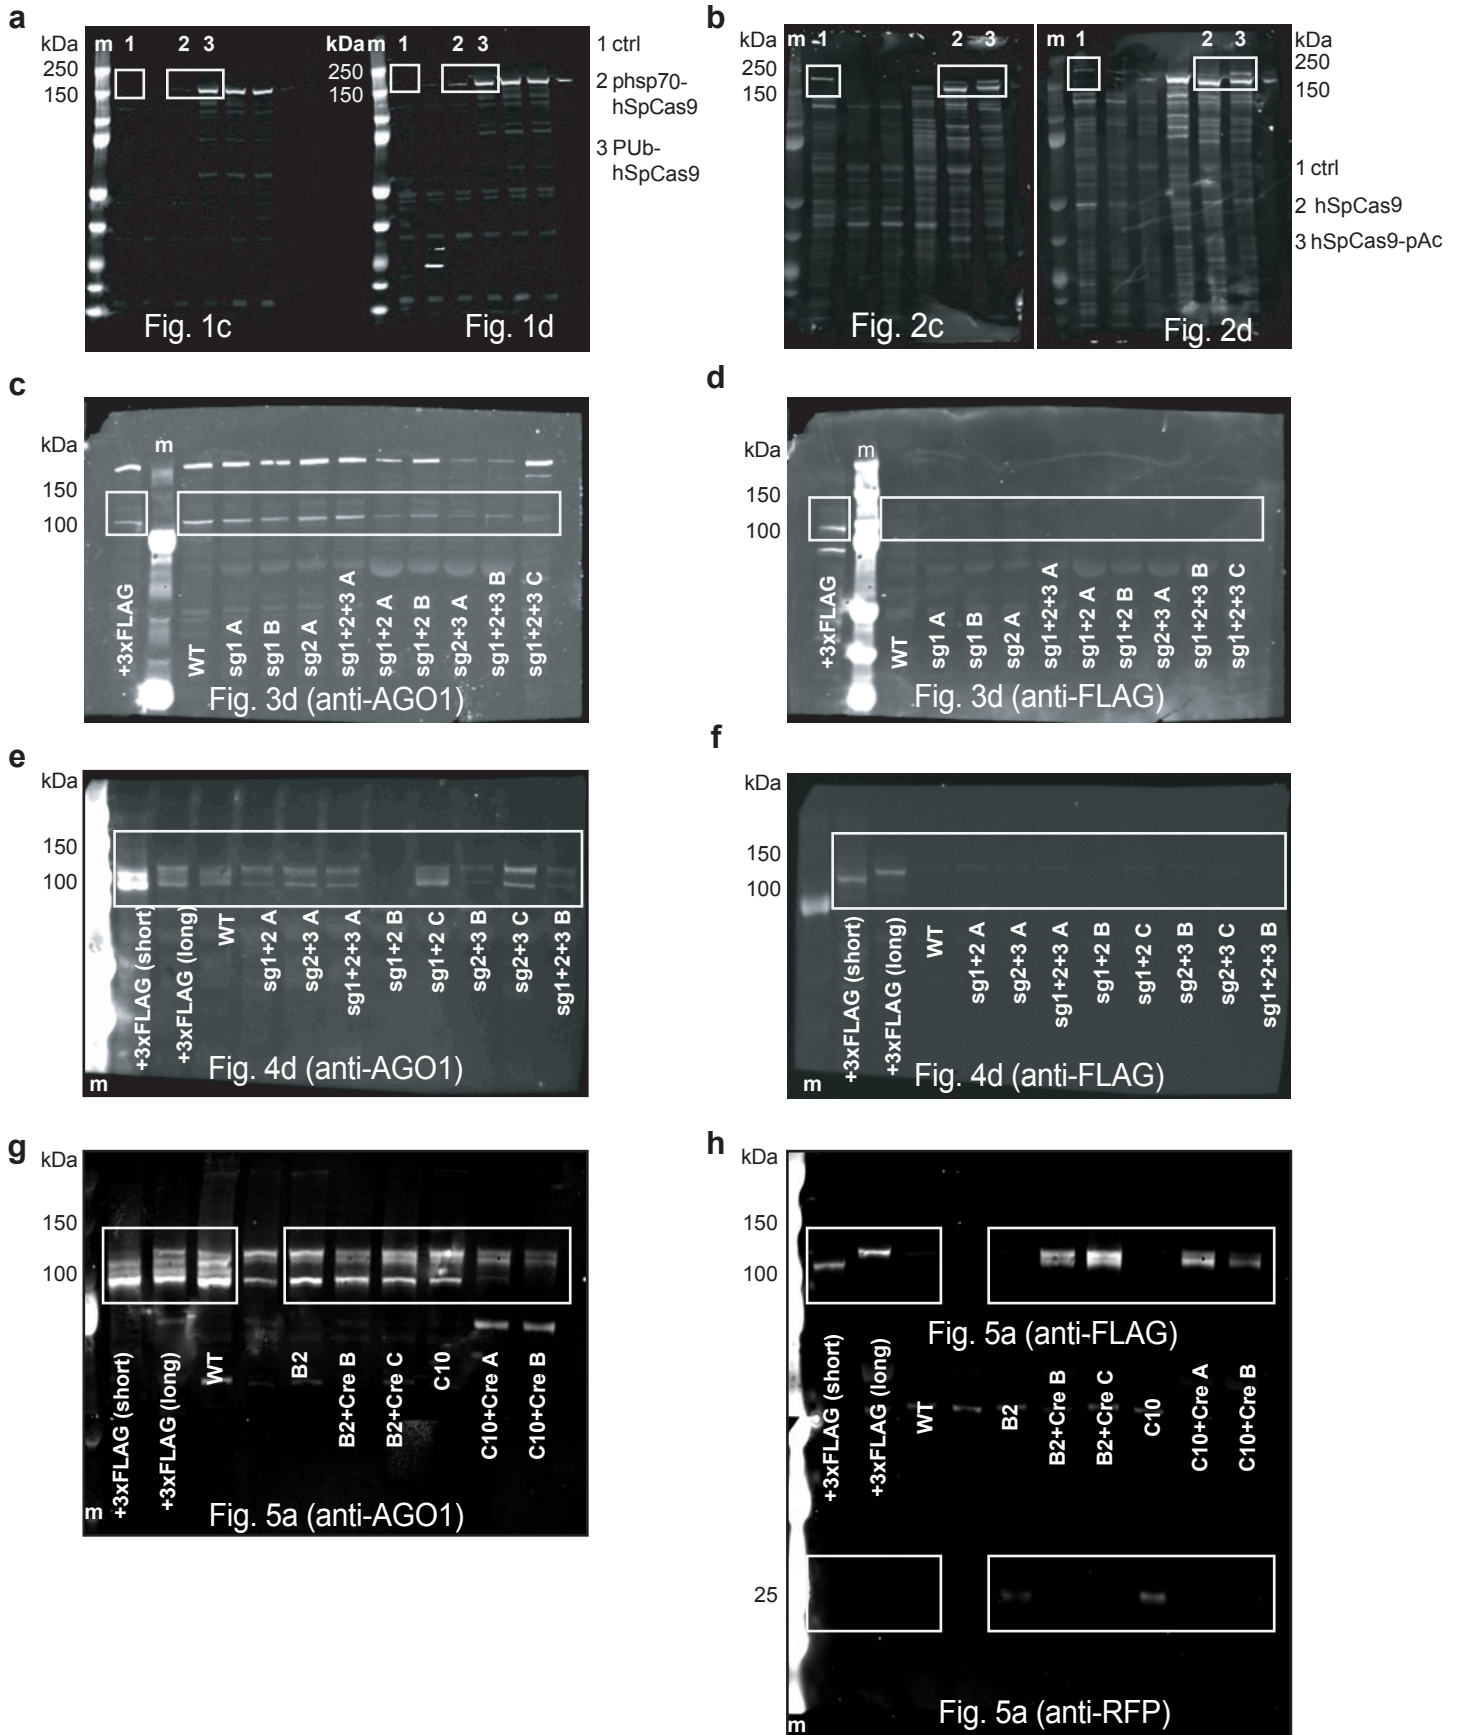

**Supplementary Figure 4. Full-length blots.**

(a-h) Full-length blots for all Figures. Regions included in Figures are indicated with boxes; m = marker, kDa = kilodaltons.

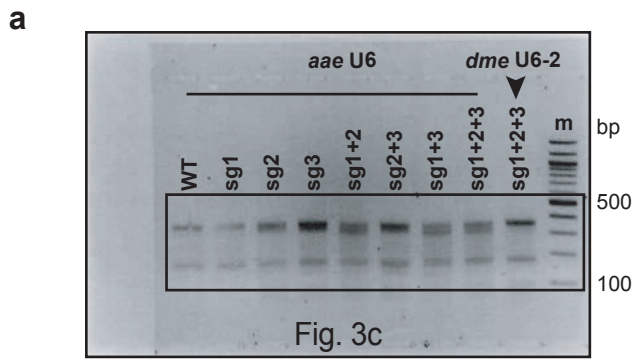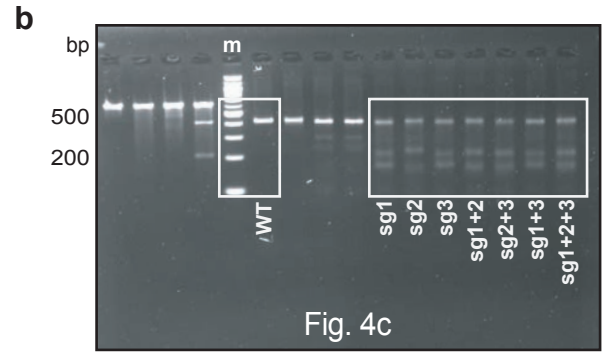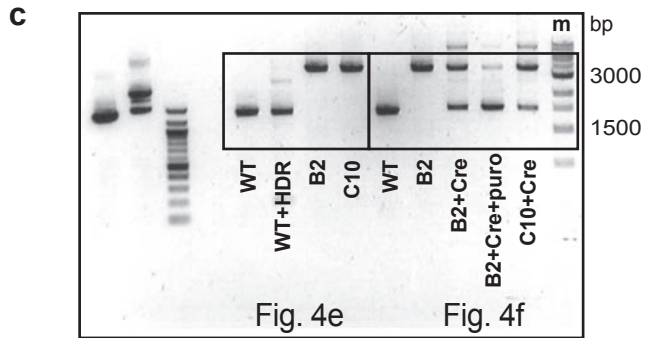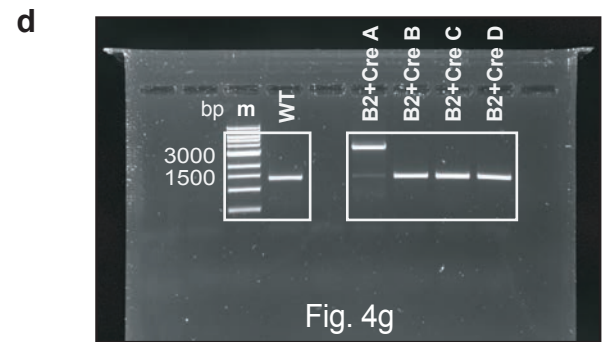

**Supplementary Figure 5. Full-length gels.**

(a-d) Full-length gels for all Figures. Regions included in Figures are indicated with boxes; m = marker, bp = base pairs.



## Supplementary Tables

**Supplementary Table 1. Sequences of all oligos used in this study.**

| Oligo ID                                           | Sequence                                                                                                                                                                                                                                                                          | Purpose                                                          |
|----------------------------------------------------|-----------------------------------------------------------------------------------------------------------------------------------------------------------------------------------------------------------------------------------------------------------------------------------|------------------------------------------------------------------|
| <i>pKRg cloning</i>                                |                                                                                                                                                                                                                                                                                   |                                                                  |
| RU-O-22971                                         | CTGCAGAATTGGCGCAAGCGCTAAAAACGGACT                                                                                                                                                                                                                                                 | introduce <i>AfeI</i> pDCC6 forward; PAGE-purified               |
| RU-O-22972                                         | AGTCCGTTTTAGCGCTTGGGCCAATTCTGCAG                                                                                                                                                                                                                                                  | introduce <i>AfeI</i> pDCC6 reverse; PAGE-purified               |
| RU-O-22977                                         | GACAGCGCTTGGCCAAATTCGACAGCAAAATGGCTATCTTTACATGTAGCTTGTGC<br>ATTG                                                                                                                                                                                                                  | Pub promoter PCR forward                                         |
| RU-O-22978                                         | GTCCCTAGGTGTATACCCTCCGGAAGCGCCACTCGAGATTCGAACAAGCTTATCGA<br>GCTTGGTGTGAAATCTCTGTTGAGC                                                                                                                                                                                             | Pub promoter PCR reverse                                         |
| RU-O-22974                                         | GACGAAGACTATATAAGAGCAGAGGCAAGAGTAGTAAATGGAGACGACTCTCTG<br>TTTTAGAGCTAGAAATAGC                                                                                                                                                                                                     | tracr RNA scaffold PCR forward                                   |
| RU-O-22975                                         | GCAGAAATGGCGCAAGCGCTGTC                                                                                                                                                                                                                                                           | tracr RNA scaffold & assemble <i>aae</i> U6/scaffold PCR reverse |
| RU-O-22976                                         | GACGAAGAGCGCCCAATACGCCAA                                                                                                                                                                                                                                                          | assemble <i>aae</i> U6/scaffold PCR forward                      |
| gBLOCK <i>aae</i> U6                               | GAAGAGCGCCCAATACGCCAAACCGCTCTCCCGGGGTTGGCCGATTCATTAATG<br>CAGGCCAATCGTGAAGTAGGCGGATCAGCGAATGAAATCGCCCATCGAGTTGAT<br>ACGTCATCCATCGCTAGAACCGGTTTCGCTGTAGAGACTATATAAGAGCAGAGG<br>CAAGAGTAGTAAATGGAGACG                                                                               | U6 geneblock                                                     |
| RU-O-23101                                         | GATATTGATTACAAAGACGATGACGATACCATTGGCCCAAGAAG                                                                                                                                                                                                                                      | introduce <i>NcoI</i> remove 3xFLAG forward; PAGE-purified       |
| RU-O-23100                                         | CTTCTTTGGGGCATTGGTATCGTCATCGTCTTTGTAATCAATATC                                                                                                                                                                                                                                     | introduce <i>NcoI</i> remove 3xFLAG reverse; PAGE-purified       |
| RU-O-25485                                         | GACCCTAGGATGGGCCAAAGAAG                                                                                                                                                                                                                                                           | Cre into pKRg4 forward                                           |
| RU-O-25486                                         | CGGTAGAGCTCATCGCCATCTCCAG                                                                                                                                                                                                                                                         | Cre into pKRg4 reverse                                           |
| <i>sgRNA oligos</i>                                |                                                                                                                                                                                                                                                                                   |                                                                  |
| RU-O-23427                                         | AAATGGTACTTACGCTGTCCCTACG                                                                                                                                                                                                                                                         | pKRg Aag2 Ago1 sgRNA 1 forward                                   |
| RU-O-23428                                         | AAACCGTAGGACAGCGCTAAGTACC                                                                                                                                                                                                                                                         | pKRg Aag2 Ago1 sgRNA 1 reverse                                   |
| RU-O-23430                                         | AAATGAGCGTGAAAATGTACCCCGT                                                                                                                                                                                                                                                         | pKRg Aag2 Ago1 sgRNA 2 forward                                   |
| RU-O-23431                                         | AAACACGGGTACATTTTCACGCTC                                                                                                                                                                                                                                                          | pKRg Aag2 Ago1 sgRNA 2 reverse                                   |
| RU-O-23433                                         | AAATGACGGTACTTACGCTGTCCCTA                                                                                                                                                                                                                                                        | pKRg Aag2 Ago1 sgRNA 3 forward                                   |
| RU-O-23434                                         | AAACTAGGACAGCGTAAGTACCGTC                                                                                                                                                                                                                                                         | pKRg Aag2 Ago1 sgRNA 3 reverse                                   |
| RU-O-23456                                         | AAATGTAGTGGTGCACGAAGCCCG                                                                                                                                                                                                                                                          | pKRg U4.4 Ago1 sgRNA 1 forward                                   |
| RU-O-23457                                         | AAACCGGGCTTCGTGCACCACTAC                                                                                                                                                                                                                                                          | pKRg U4.4 Ago1 sgRNA 1 reverse                                   |
| RU-O-23459                                         | AAATGTCCAGATAACGATGCCCG                                                                                                                                                                                                                                                           | pKRg U4.4 Ago1 sgRNA 2 forward                                   |
| RU-O-23460                                         | AAACCGGGCATCGTTATCTGGAAC                                                                                                                                                                                                                                                          | pKRg U4.4 Ago1 sgRNA 2 reverse                                   |
| RU-O-23462                                         | AAATGACTTCCAGATAACGATGCC                                                                                                                                                                                                                                                          | pKRg U4.4 Ago1 sgRNA 3 forward                                   |
| RU-O-23463                                         | AAACCGGCATCGTTATCTGGAAGTC                                                                                                                                                                                                                                                         | pKRg U4.4 Ago1 sgRNA 3 reverse                                   |
| <i>HDR donor template oligos</i>                   |                                                                                                                                                                                                                                                                                   |                                                                  |
| RU-O-24703                                         | GACCATGATTACGAATTCGACATGTAGGACATGTGGGG                                                                                                                                                                                                                                            | Aag2 HA PCR forward                                              |
| RU-O-24704                                         | CCAGCTGCAGGGCGCCGCCACCGATTGCTTTTCGTC                                                                                                                                                                                                                                              | Aag2 HA PCR reverse                                              |
| gBLOCK Aag2 HDR donor template                     | CGAAAAGTGCAAAAATTCGGCCGTAATTAGTTCGCTTCCGTTTTTCCGAGTGCCTC<br>CGATCGTTAGCGGACCGTTCGGGGTGTGATTTAAGCGTGAATGGATTACAAGGA<br>TCACGATGGAGATTACAAGGATCAGCATATCGATTACAAGGATGATGATAAGTATC<br>CGGTGGTCAACGTAAGTACCGTTTCCGACGTTTGAAAAAAGTCAATTCACAAG<br>AGAAGAAAAAAGTGTGACGAGGGGACCTTCTCTCCCTC |                                                                  |
| RU-O-25019                                         | GGAGCGTCCGTAAAATGAAA                                                                                                                                                                                                                                                              | <i>Kpn1</i> HA overlap forward                                   |
| RU-O-25020                                         | ATAACTTCGTATAGCATACATTATACGAAGTTATTTTCACGCTTAAATC                                                                                                                                                                                                                                 | 5'HA add loxP reverse                                            |
| RU-O-25021                                         | GCTATACGAAGTTATTTATCTTTACATGTAG                                                                                                                                                                                                                                                   | loxP-Pub forward                                                 |
| RU-O-25022                                         | GATCAGCTCGCTCATGCGGCGGCTAGAGCTCCGAATTCAC                                                                                                                                                                                                                                          | pUB-RFP reverse                                                  |
| RU-O-25023                                         | ATGAGCGAGCTGATC                                                                                                                                                                                                                                                                   | RFP forward                                                      |
| RU-O-25024                                         | CATTATACGAAGTTATTAATTAATTATCTGTGCCCCAG                                                                                                                                                                                                                                            | RFP-loxP reverse                                                 |
| RU-O-25027                                         | ATAACTTCGTATAATGTATGCTATACGAAGTTATATGGATTACAAGGATC                                                                                                                                                                                                                                | loxP-HA forward                                                  |
| RU-O-25028                                         | AGAGACGAGAGGGGAGGAAGG                                                                                                                                                                                                                                                             | HA <i>PpuMI</i> overlap reverse                                  |
| <i>Sequencing, surveyor &amp; integration PCRs</i> |                                                                                                                                                                                                                                                                                   |                                                                  |
| RU-O-26075                                         | ACTTGTCTCACTCGCCATCATAAG                                                                                                                                                                                                                                                          | Aag2 HDR PCR F                                                   |
| RU-O-26076                                         | CGATCAGATGCGCACGAAAAT                                                                                                                                                                                                                                                             | Aag2 HDR PCR R                                                   |
| RU-O-22776                                         | ACTTGTCTCACTCGCCATCA                                                                                                                                                                                                                                                              | Aag2 surveyor/sequencing forward                                 |
| RU-O-22777                                         | GTCCGTACACAGGAAAAGCC                                                                                                                                                                                                                                                              | Aag2 surveyor/sequencing reverse                                 |
| RU-O-22929                                         | GCCAACCATTCCAGATAACG                                                                                                                                                                                                                                                              | U4.4 surveyor forward                                            |
| RU-O-24042                                         | AGGATGGCATCGTACGGAAT                                                                                                                                                                                                                                                              | U4.4 surveyor reverse                                            |
| RU-O-22930                                         | TCTACCGGTGTTCACTGTGTC                                                                                                                                                                                                                                                             | U4.4 sequencing forward                                          |
| RU-O-22931                                         | TGATCTCCCGGTTGACCTTC                                                                                                                                                                                                                                                              | U4.4 sequencing reverse                                          |
| <i>Reporter cloning oligos</i>                     |                                                                                                                                                                                                                                                                                   |                                                                  |
| RU-O-24800                                         | TCGAGCAACCAGTAGGCCACTGCCACCGCAACCAGCTAGGCCACTGCCACCGGC<br>AACCAGCTAGGCCACTGCCACCGCAACCAGCTAGGCCACTGCCAGC                                                                                                                                                                          | Aag2 miR-34-5p 4x ideal psiCHECK2 forward                        |
| RU-O-24801                                         | GGCCGTTGGCAGTGGCCTAGTGGTTGGCGTGGCAGTGGCCTAGTGGTTGCCCG<br>TGGCAGTGGCCTAGTGGTTGGCGTGGCAGTGGCCTAGTGGTTGTC                                                                                                                                                                            | Aag2 miR-34-5p 4x ideal psiCHECK2 reverse                        |
| RU-O-24794                                         | TCGAGCAACCAGCTAACCAACTGCCAGC                                                                                                                                                                                                                                                      | Aag2 miR-34-5p perfect psiCHECK2 forward                         |
| RU-O-24795                                         | GGCCGTTGGCAGTGGTGTAGTGGTTGTC                                                                                                                                                                                                                                                      | Aag2 miR-34-5p perfect psiCHECK2 reverse                         |

HA = homology arm; HDR = homology-directed repair; tracr = trans-activating CRISPR; sgRNA = single-guide RNA. All oligos were ordered in standard desalted format from IDT, unless indicated otherwise.

pKRG3-mU6-PUb-3xFLAG-hSpCas9

aae U6

BsmBI sites for sgRNA cloning  
sgRNA tracrRNA and U6 terminator

aae Pub promoter

3xFLAG

NLS

hSpCas9

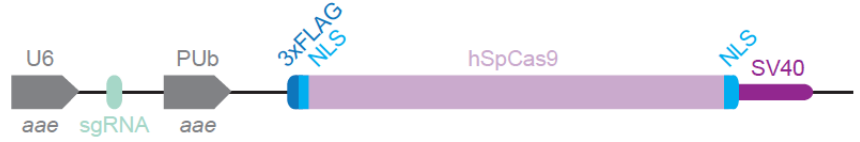

GCGCCCAATACGCAAACCGCCTCTCCCCGCGGGTTGGCCGATTCATTAATGCAGGCAACTCGTGAAAGGTAGGCGGATCAGCGAATGAA  
 ATCGCCCATCGAGTTGATACGTCCATCCATCGCTAGAACCAGCTTCCGCTGTAGAAGACTATATAAGAGCAGAGGCAAGAGTAGTGAAAT  
 gGAGACGaCGTCTCtGTTTTAGAGCTAGAAATAGCAAGTTAAAATAAAGGCTAGTCCGTTATCAACTTGAAAAAGTGGCACCAGTTCGGT  
 GCTTTTTTGTTTTAGAGCTAGAAATAGCAAGTTAAAATAAAGGCTAGTCCGTTTTTAGCGCTTGCGCCAATTCTGCAGACAAATGGCTAT  
 CTTTACATGTAGCTTGTGCATTGAATCCAATTATAATTTGCTTTGGCACCAGCTGAGCCAGACAAGAAAAGAAAGCTTCCCAGAAGTATA  
 TCGATTTAGAAGGGTTGACGTCACCTTGTCTGACTGCACCTAATACAGCAAATGATGCAATTAGAATGATTCAAGTGAATTTCCCAAATTAC  
 TGATTTTTCTCTGGATTTGGTTATCAGATTACATTCGAAGCTAAGATTAGCTACCGAAATTGTCGATCAAATCAGGAAATCCTTTCTCT  
 ATCGAAAAAGGCATTTCGCACATCTTCTCTATGCCATATACAGAAAGGTTAGGTACATTGACGCTTTTCCAGAAAGTTGAACTGCAT  
 CGTTCAAGGTACAGAATGAACGACTAACAGACACAAGCACGTTTTGCTGTCCATTACAGACACAGGGATGGTACCCATATTCGATCGATA  
 TAGAGCCATCCAACCGAACAGAGGTATATGTATGAATGTATTGCTGAAATTTCTAGAAGTACAACCACCTACGACAGTGTCTATAA  
 AACGCCCCGCAAAGGCGAAACCAGCTCAATCGAATACGTTTTCTAGTGGAGTGAACATTACGCGGCCCAAGTAAGCAGTGCCAGTGCA  
 AGTGAAGTGAAGTCTCTAGTGAAGAAAGAGTATCCAATTAGCCAGAGGAGAAAATTTTCCAGAGTGAACAAAGCTTTATTCAAAGGACAAT  
 TACTATTAATTTGGTGAAGTGCATTTCCGTTGAAGGGAATCTTCTAGTGAAGGTAGGTAAATTAATTGATGAAATTTATAGCTATGAGCG  
 AAACTAGTTTTGGTGAATGATTCTTTGCTTTGAATGAGCAAATTTTTCCAAGATGGCGACTATTGAGCTTTGAGTGATTAGTGAA  
 AATTTGCAACGCAGTTTCATCATCATTGATAAAACCCAATTGTGATTACACAGCGATAATCATATTTGTTGAATCATCGCTACTAATTG  
 AATTAATTTCTAGAATAATAAGAATAACGTATTTGCTCCGTCACATATCTAAAATAAATATTTTGGTGAATTTACCCATTAAGGTAA  
 TATTAACACATATCGAGAAAAACCTTGAGGAAATCGTGAAGAACTTGAAGATACGCAATTTCAAACCTACGTAGTTCAAAGTTCGAAAAA  
 AGTTAATTTTTCACTTAAAAGTAGGGCGTTGTTGTGACGTCATCACCTTCAAGTGTATATTTTTCACTTGGCCTGCGACTGCAAACGCA  
 GACAAAGCAAAACAAGTTTAAAACCTGTCTGTCTGTCTCGAAGCCAAAGGCAATGAATCAATATCAAATGAGAGTTTGCATTTCAAA  
 CCAATTACTCAAGCGTTTTCTCTGTTTTCTTTTCTGCTCAACAGAGATTTCAACACCAAGCTCGATAAGCTTGTTCGAATCTCGAGTGGC  
 CGTTTCCGGAGGTATACACCTAGGCGGTACCACTGCAGTGAATTCGGAGCTTACCAGTGCACCATGGACTATAAGGACCACGACGGGA  
 GACTACAAGGATCATGATATTGATTACAAAGACGATGACGATAAGATGGCCCCAAAGAAGAAGCGGAAGGTTCGGTATCCACGGAGTCCC  
 AGCAGCCGACAAGAAGTACAGCATCGGCCCTGGACCTCGGCACCAACTCTGTGGGCTGGGCCGTGATCACCGACGAGTACAAGTGGCCCA  
 GCAAGAAATCAAGTGTCTGGCAACACCGACCGGCACAGCATCAAGAAGAACCTGATCGGAGCCCTGCTGTTTCGACAGCGCGAAACA  
 GCCGAGCCACCCGGCTGAAGAGAACCAGCCAGAAGAAGTACACCAAGCAAGAACCAGGATCTGCTATCTGCAAGAGATCTTCAGCAA  
 CGAGATGGCCAAGGTGGACGACAGCTTCTTCCACAGACTGGAAGAGTCTTCTGTTGGAAGAGGATAAGAAGCAGAGCGGCACCCCA  
 TCTTCGGCAACATCGTGGACGAGGTGGCCTACCACGAGAAGTACCCACCATCTACCACCTGAGAAAAGAACTGGTGGACAGCACCGAC  
 AAGGCCGACCTGCGGCTGATCTATCTGGCCCTGGCCACATGATCAAGTTCGGGGCCACTTCTGATCGAGGGCGACCTGAACCCCGA  
 CAACAGCGACGTGGACAAGCTGTTTCATCCAGCTGGTGCAGACCTACAACCAGCTGTTTCGAGGAAAACCCCATCAACGCCAGCGGCGTGG  
 ACGCCAAGGCCATCCTGTCTGCCAGACTGAGCAAGAGCAGACGGCTGGAAAATCTGATCGCCAGCTGCCCGGCGAGAAGAAGTGGC  
 CTGTTTCGAAACCTGATTGCCCTGAGCCTGGCCCTGACCCCAACTTCAAGAGCAACTTCGACCTGGCCGAGGATGCCAACTGCAGCT  
 GAGCAAGGACACCTACGACGACGACCTGGACAACCTGCTGGCCAGATCGGCAGCAGTACGCCGACCTGTTTCTGGCCGCAAGAACC  
 TGTCCGACGCCATCCTGCTGAGCGACATCCTGAGAGTGAACACCGAGATCACAAGGCCCCCTGAGCGCCTCTATGATCAAGAGATAC  
 GACGAGCACCACCAGGACCTGACCCTGCTGAAAGCTCTCGTGCAGCAGCAGCTGCCTGAGAAGTACAAGAGATTTTCTTCGACCAGAG  
 CAAGAACGGCTACGCCGGCTACATTGACGGCGGAGCCAGCCAGGAAGAGTTTACAAGTTCATCAAGCCCATCCTGGAAAAGATGGACG  
 GCACCGAGGAAGTCTCGTGAAGCTGAACAGAGAGGACCTGCTGCGGAAGCAGCGGACCTTCGACAACGGCAGCATCCCCACCAGATC  
 CACCTGGGAGAGCTGCACGCCATTCTGCGGCGGCAGGAAGATTTTTACCATTCTGAAGGACAACCGGAAAAGATCGAGAAGATCCT  
 GACCTTCCGCATCCCCTACTACGTGGGCCCTCTGGCCAGGGGAAACAGCAGATTCGCTGGATGACCAGAAAAGAGCGAGGAAACCATCA  
 CCCCCTGGAACCTCGAGGAAGTGGTGGACAAGGGCGCTTCCGCCAGAGCTTCATCGAGCGGATGACCAACTTCGATAAGAACCCTGCC  
 AACGAGAAGGTGCTGCCAAGCAGCCTGCTGTACGAGTACTTCACCGTGTATAACGAGCTGACCAAAGTGAATACGTGACCGAGGG  
 AATGAAAAGCCGCTTCTGAGCGCGGAGCAGAAAAAGGCCATCGTGGACCTGCTGTTCAAGACCAACCGGAAAGTACCGTGAAGC  
 AGCTGAAAAGAGGACTACTTCAAGAAAAATCGAGTCTTCGACTCCGTGGAAATCTCCGGCTGGAAGATCGGTTCAACGCCTCCCTGGGC  
 ACATACCAGATCTGCTGAAAATTTCAAGGACAAGGACTTCTGGACAATGAGGAAAACGAGGACATTCTGGAAGATATCGTGTGAC  
 CCTGACACTGTTTGGAGACAGAGAGATGATCGAGGAACGGCTGAAAACCTATGCCACCTGTTTCGACGACAAAGTATGAAGCAGCTGA  
 AGCGGCGGAGATACACCGCTGGGGCAGGCTGAGCCGGAAGCTGATCAACGGCATCCGGGACAAGCAGTCCGGCAAGACAATCCTGGAT  
 TTCCTGAAGTCCGACGGCTTCGCCAACAGAAAATTCATGCAGCTGATCCACGACGACAGCCTGACCTTTAAAGAGGACATCCAGAAAAGC  
 CCAGGTGTCCGGCCAGGGCGATAGCCTGCACGAGCACATTGCCAATCTGGCCGGCAGCCCCGCCATTAAGAAGGGCATCCTGCAGACAG  
 TGAAGGTGGTGGACGAGCTCGTGAAGTGTGGGCCGGCACAAGCCGAGAACATCGTGTGAAATGGCCAGAGAGAACCAGACCACC  
 CAGAAGGGACAGAAGAACAGCCGCGAGAGAATGAAGCGGATCGAAGAGGGCATCAAAGAGCTGGGCAGCCAGATCCTGAAAGAACACCC  
 CGTGGAAAACACCCAGCTGCAGAACGAGAAGCTGTACTGTACTACCTGCAGAATGGGCGGGATATGTACGTGGACCAGGAAGTGGACA  
 TCAACCGGCTGTCCGACTACGATGTGGACCATATCGTGCCTCAGAGCTTTCTGAAGGACGACTCCATCGACAACAAGGTGCTGACCAGA  
 AGCGACAAGAACCAGGGCAAGAGCGACAACGTGCCCTCCGAAGAGGTGCTGAAGAAGATGAAGAAGTACTGGCGGCAGCTGCTGAACGC  
 CAAGCTGATTACCCAGAGAAAGTTCGACAATCTGACCAAGGCCGAGAGAGGCGGCTGAGCGAAGTGGATAAGGCCGGCTTCATCAAGA  
 GACAGCTGGTGGAAACCCGGCAGATCACAAGCACGTGGCACAGATCCTGGACTCCCGGATGAACACTAAGTACGACGAGAATGACAAG

CTGATCCGGGAAGTGAAAGTGATCACCTGAAGTCCAAGCTGGTGTCCGATTTCCGGAAGGATTTCCAGTTTTACAAAGTGC GCGAGAT  
CAACAAC TACCACCAGCCCACGACGCTACCTGAACGCCGTCGTGGGAACCGCCCTGATCAAAAAGTACCCTAAGCTGGAAAGCGAGT  
TCGTGTACGGCGACTACAAGGTGTACGACGTGCGGAAGATGATCGCCAAGAGCGAGCAGGAAATCGGCAAGGCTACCGCCAAGTACTTC  
TTCTACAGCAACATCATGAACTTTTTCAAGACCGAGATTACCCTGGCCAACGGCGAGATCCGGAAGCGGCCTCTGATCGAGACAAACGG  
CGAAACCGGGGAGATCGTGTGGGATAAGGGCCGGGATTTTTGCCACCCTGCGGAAAGTGCTGAGCATGCCCCAAGTGAATATCGTGAAAA  
AGACCGAGGTGCAGACAGGCGGCTTCAGCAAAGAGTCTATCCTGCCCAAGAGGAACAGCGATAAGCTGATCGCCAGAAAAGAAGGACTGG  
GACCCTAAGAAGTACGGCGGCTTCGACAGCCCCACCCTGGCCTATTCTGTGCTGGTGGTGGCCAAAGTGGAAAAGGGCAAGTCCAAGAA  
ACTGAAGAGTGTGAAAGAGCTGCTGGGGATCACCATCATGGAAAGAAGCAGCTTCGAGAAGAATCCCATCGACTTTCTGGAAGCCAAGG  
GCTACAAAGAAGTAAAAAGGACCTGATCATCAAGCTGCCTAAGTACTCCCTGTTTCGAGCTGGAAAACGGCCGGAAGAGAATGCTGGCC  
TCTGCCGGCGAAGTGCAGAAGGGAACGAAGTGGCCCTGCCCTCCAATATGTGAACCTCCCTGTACTCCCTGAGCCACTATGAGAAGT  
GAAGGGCTCCCCGAGGATAATGAGCAGAAACAGCTGTTTTGTGGAACAGCACAAGCACTACCTGGACGAGATCATCGAGCAGATCAGCG  
AGTTCTCCAAGAGAGTGTCTGGCCGACGCTAATCTGGACAAAGTGTGTCCGCCTACAACAAGCACCGGGATAAGCCCATCAGAGAG  
CAGGCCaAGAATATCATCCACCTGTTTACCCTGACCAATCTGGGAGCCCCTGCCGCCTTCAAGTACTTTGACACCACCATCGACCGGAA  
GAGGTACACCAGCACCAAAGAGGTGCTGGACGCCACCCTGATCCACCAGAGCATCACCGGCCTGTACGAGACACGGATCGACCTGTCTC  
AGCTGGGAGGCGACAGCCCCAAGAAGAAGAGAAAAGGTGGAGGCCAGCTAATAGGACCCAGCTTTCTTGTACAAAGTGGTGACGTAAGCT  
AGCAGGATCTTTGTGAAGGAACCTTACTTCTGTGGTGTGACATAATTGGACAAACTACCTACAGAGATTTAAAGCTCTAAGGTAAATAT  
AAAATTTTTAAGTGTATAATGTGTTAAACTACTGATTCTAATTGTTTGTGATTTTTAGATTCCAACCTATGGAAGTGTGAATGGGAGC  
AGTGGTGGAAATGCCTTTAATGAGGAAAACCTGTTTTGCTCAGAAGAAATGCCATCTAGTGTATGATGAGGCTACTGCTGACTCTCAACAT  
TCTACTCCTCAAAAAAGAAGAGAAAAGGTAGtGACCCCAAGGACTTTCCCTCAGAATTGCTAAGTTTTTTGAGTCATGCTGTGTTT  
TAATAGAACTCTTGCTTGCTTTGCTATTTACACCACAAAGGAAAAAGCTGCAGTGTATACAAGAAAATTATGGAAAAATATTCTGTAA  
CCTTTATAAGTAGGCATAACAGTTATAATCATAACATACTGTTTTTTCTTACTCCACACAGGCATAGAGTGTCTGCTATTAATAACTAT  
GCTCAAAAATTGTGTACCTTTAGCTTTTTAATTTGTAAAGGGTTAATAAGGAATATTTGATGTATAGTGCCTTGACTAGAGATCATAA  
TCAGCCATACCACATTTGTAGAGGTTTTACTTGTCTTTAAAAAACCTCCACACCTCCCCCTGAACCTGAAACATAAAATGAATGCAATT  
GTTGTTGTTAACTTGTTTATTGCGACTTATAATGGTTACAAATAAAGCAATAGCATCACAAATTTACAAATAAAGCATTTTTTTTCACT  
GCATTCTAGTTGTGGTTTTGTCCAAACTCATCAATGTATCTTATCATGTCTGGATCCCGTTTTAAACTACGCGTAATTCAAACAGGGTCT  
GGCGTCTTCTCGTACTGTTTTCCCCAGGCCAGTGTCTTAGCGTTATTGAAAAAGGAAGAGTATGAGTATTCAACATTTCCGTGTGCGC  
CTTATTCCTTTTTTTGCGGCATTTTGCCTTCCTGTTTTTGTCTACCCAGAAACGCTGGTGAAGTAAAAGATGCTGAAGATCAGTTGGG  
TGCACGAGTGGGTTACATCGAAGTGGATCTCAACAGCGGTAAGATCCTTGAGAGTTTTCGCCCCGAAGAAGTTCCTCAATGATGAGCA  
CTTTTAAAGTTCTGCTATGTGGCGCGGTATTATCCCGTATTGACGCCGGGCAAGAGCAACTCGGTGCGCCGATACACTATTCTCAGAA  
GACTTGGTTGAGTACTCACCAGTACAGAAAAGCATCTTACGGATGGCATGACAGTAAGAGAATTATGCAGTGTGCCATAACCATGAG  
TGATAAACA CTGCGGCCAACTTACTTCTGACAACGATCGGAGGACCGAAGGAGCTAACCGCTTTTTTGCACAACATGGGGGATCATGTAA  
CTCGCCTTGATCGTTGGGAACCGGAGCTGAATGAAGCCATACCAAACGACGAGCGTGACACCACGATGCCTGTAGCAATGGCAACAACG  
TTGCGCAAAC TATTA ACTGGCGAACTACTTACTCTAGCTTCCCGCAACAATTAATAGACTGGATGGAGGCGGATAAAGTTGCAGGACC  
ACTTCTGCGCTCGGCCCTTCCGGCTGGCTGGTTTTATTGCTGATAAATCTGGAGCCGGTGAGCGTGGGTCTCGCGGTATCATTGCAGCAC  
TGGGGCCAGATGGTAAGCCCTCCCGTATCGTAGTTATCTACACGACGGGGAGTCAGGCAACTATGGATGAACGAAATAGACAGATCGCT  
GAGATAGGTGCCTCACTGATTAAGCATTGGTAACTGTCAGACCAAGTTTACTCATATATACTTTAGATTGATTTAAAACCTTCATTTTTTA  
ATTTAAAAGGATCTAGGTGAAGATCCTTTTTGATAATCTCATGACCAAAATCCCTTAACGTGAGTTTTCGTTCCACTGAGCGTCAGACC  
CCGTAGAAAAGATCAAAGGATCTTCTTGAGATCCTTTTTTTCTGCGCGTAATCTGCTGCTTGCAACAACAAAAAACCCCGCTACCAGCG  
GTGGTTTTGTTTGGCGGATCAAGAGCTACCAACTCTTTTTCCGAAGGTAAGTGGCTTCAGCAGAGCGCAGATACCAAATACTGTTCTTCT  
AGTGTAGCCGTAGTTAGGCCACCCTTCAAGAACTCTGTAGCACCAGCTACATACCTCGCTCTGCTAATCCTGTTACCAGTGGCTGCTG  
CCAGTGGCGATAAGTGTGCTTACCAGGGTTGGACTCAAGACGATAGTTACCAGGATAAGGCGCAGCGGTGGGGCTGAACGGGGGGTTCCG  
TGCACACAGCCCAGCTTGGAGCGAACGACCTACACCGAACTGAGATACCTACAGCGTGAGCTATGAGAAAGCGCCACGCTTCCCGAAGG  
GAGAAAGGCGGACAGGTATCCGGTAAGCGGCAGGGTCGGAACAGGAGAGCGCACGAGGGAGCTTCCAGGGGGAAACGCCTGGTATCTTT  
ATAGTCTGTGCGGTTTTCGCCACCTCTGACTTGAGCGTCGATTTTTGTGATGCTCGTCAGGGGGGCGGAGCCTATGGAAAAACGCCAGC  
AACGCGGCCTTTTTACGGTTCCTGGCCTTTTGTGCTGACATGTTCTTTCTGCGTTATCCCCTGATTCTGTGGATAACCG  
TATTACCGCCTTTGAGTGTGCTGATACCGCTCGCCGACGCCAAGCAGCCGAGCGAGTCAAGTGTGAGCGAGGAAGCGGAAGA

pKRG3-mU6-Pub-hSpCas9

aae U6

BsmBI sites for sgRNA cloning  
sgRNA tracrRNA and U6 terminator

aae Pub promoter

NLS

hSpCas9

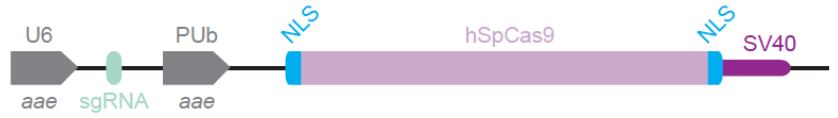

GCGCCCAATACGCAAACCGCCTCTCCCCGCGGGTTGGCCGATTCATTAATGCAGGCAACTCGTGAAAGGTAGGCGGATCAGCGAATGAA  
 ATCGCCCATCGAGTTGATACGTCCATCCATCGCTAGAACCGCGTTTCGCTGTAGAAGACTATATAAGAGCAGAGGCAAGAGTAGTGAAAT  
 gGAGACGaCGTCTCtGTTTTAGAGCTAGAAATAGCAAGTTAAAAATAAGGCTAGTCCGTTATCAAACTTGAAAAAGTGGCACCAGTCCGGT  
 GCTTTTTTTGTTTTAGAGCTAGAAAATAGCAAGTTAAAAATAAGGCTAGTCCGTTTTTATAGCGCTTGCGCCAATTTCTGCAGACAAAATGGC  
 TATCTTTACATGTAGCTTGTGCATTGAATCCAATTATAATTTGCTTTGGCACCAGCTGAGCCAGACAAAGAAAAGAAAGCTTCCCAGAAGTATA  
 TCGATTTTAGAAGGGTTGACGTCACTTGTCTGACTGCACATAACAGCAAATGATGCAATTAGAATGATTCAAAGTGAATTTCCCAAATTAC  
 TGATTTTTTCTCTGGATTTGGTTATCAGATTACATTCGAAGCTAAGATTAGCTACCGAAAATGTTCGATCAAATCAGGAAATCCTTTCTCT  
 ATCGAAAAAGGCATTCGCACATCTTCCCTCTATGCCATATACACGAAGGGTAGGTACATTCAGCTCTTTGCCAGAAAGTTGAACTGCAT  
 CGTTCAAGGTACAGAAATGAACGACTAACAGACACAAGCACGTTTTGCTGTCCATTCAGACACAGGGATGGTACCCATATTCGATCGATA  
 TAGAGCCATCCAACCGAACAGAGGTATATGTATGAATGTATTGCTGAAATTTTCTAGAAGTACAACCACCACTACGACAGTGTCTATAA  
 AACGCCCTGCAAAGGCGAAAACAGCTCAATCGAATACGTTTCCTAGTGGAGTGAAACATTACGCGGCCAAAGTAAGCAGTGCCAGTGCA  
 AGTGAAGTGAAGTCTCTAGTGAAGAAAGAGTGATCCAATTAGCCAGAGGAGAAAATTTTCAGAGTGAACAAAAGCTTTATTTCAAAGGACAAT  
 TACTATTTAAATTTGGTGAAGTGCAATTTCCGTTGAAGGGAATCTTCTAGTGAAGGTAGGTAAAATTAATTTGATGAAATTTATAGCTATGAGCG  
 AAAACTAGTTTTGGTGAATGATTCCTTTGTCTTTGAATGAGCAAATATTTTCCAAGATGGCGACTATTTGAGCTTTGAGTGATTAGTGAA  
 AATTTGCAACGCAGTTTCATCATCATTTGATAAAAACCAATTTGTGATTCACAGCGATAATCATATTTCTGTTGAATCATCGCTACTAATTG  
 AATTTAAATTTCTAGAATAATAAGAATAACGTATTTGCTCCGTCACATATCTAAAATAAATATTTTGATGGTAATTACCCATTAAGGTAA  
 TATTAACACATATCGAGAAAAACCTTGAGGAAATCGTGAAAACCTTGAAGATACGCAATTTCAAACACTACGTAGTTCAAAGTCGAAAACA  
 AGTTAATTTTCACTTAAAAGTAGGGCGTTGTTGTGACGTCATCACCTTCAAGTGTATATTTTCACTTGGCCTGCGACTGCAAACGCA  
 GACAAAGCAAACAAGTTTAAAACCTGTCTGTCTGCTCGAAGCCAAAGGCAATGAATCAATATCAAATGAGAGTTTTGCATTTACAAA  
 CCAATTACTCAAGCGTTTTCTCGTTTTCTTTTTCTGCTCAACAGAGATTTCAACA  
 CCAAGCTCGATAAGCTTGTTCGAATCTCGAGTGGC  
 CGCTTCCGGAGGTATACACCTAGGCGGTACCCTGCAGTGAATTCGGAGCTCTACCGGTGCCACCATGGCCCCAAAGAAGAAGCGGAA  
 GTCGGTATCCACGGAGTCCCAGCAGCCGACAAGAAGTACAGCATCGGCCTGGACATCGGCACCAACTCTGTGGGCTGGGCCGTGATCAC  
 CGACGAGTACAAGGTGCCAGCAAGAAATTCAGGTGCTGGGCAACACCCGACCGGCACAGCATCAAGAAGAACCTGATCGGAGCCCTGC  
 TGTTTCGACACCGCGCAACACCGGAGGCCACCCGGCTGAAGAGAACCCGCAAGAAGATACACCAGACCGGAAGAACCAGGATCTGCTAT  
 CTGCAAGAGATCTTCAGCAACAGATGGCCAAAGTGGACAGCAGCTTCTTCCACAGATGGAAGATCTTCTGTTGGAAGAGATAA  
 GAAGCAGGAGCGCACCCCATCTTCGCGCAACATCGTGGACAGAGTGGCCCTACCACAGAAAGTACCCCACTTACCACCTGAGAAAGA  
 AACTGTTGGACAGCACCGACAAGGCCGACTGCGGCTGATCTATCTGGCCCTGGCCACATGATCAAGTTCCGGGGCACTTCTGATC  
 GAGGGCGACTGAAACCCGACAACAGCGACGTGGACAAGCTGTTTCAATCCAGCTGGTGCAGACCTACAACCAGCTGTTTCGAGGAAAAACC  
 CATCAACGCCAGCGCGTGGACGCCAAGGCCATCTGTCTGCCAGACTGAGCAAGAGCAGACGGCTGGAAAACTGATCGCCAGCTGC  
 CCGCGAGAAGAAGATGGCCTGTTTCGAAAACCTGATTTGCCCTGAGCCTGGGCCGACTGACCCCAACTTCAAGAGCAACTTCGACCTGGCC  
 GAGGATGCCAAACTGCAGCTGAGCAAGGACACCTACGACGACGACCTGGACAACCTGCTGGCCAGATCGGCAGCAGTACGCCGACCT  
 GTTTTCTGGCCCAAGAACCTGTCGACGCCATCTGCTGAGCGACATCTGAGAGTGAACACCAGATCACAAGGCCCCCTGAGCG  
 CCTCTATGATCAAGAGATACGACGAGCACCACCAGGACCTGACCCTGCTGAAAGCTCTCGTGCAGCAGCAGCTGCCTGAGAAGTACAAA  
 GAGATTTTCTTCGACCAGAGCAAGAAGGCTACGCCGCTACATTTACGCGGAGCCAGCCAGGAAGAGTTCTACAAGTTTCAAGCC  
 CATCTGGAAAAGATGGACGGCACCGAGGAACCTGCTCGTGAAGTGAACAGAGAGGACCTGCTGCGGAAGCAGCGGACCTTCGACAACG  
 GCAGCATCCCCACAGATCCACTGGGAGAGCTGCACGCCATTTGCGGGCGGAGGAAGATTTTTTACCCATTCCTGAAGGACAACCGG  
 GAAAAGATCGAGAAGATCCTGACCTTCCGCATCCCCTACTACGTGGGCCCTCTGGCCAGGGGAAACAGCAGATTCGCCCTGGATGACCAG  
 AAAGAGCGAGGAAACCATCACCCCTGGAACTTCGAGGAAAGTGGTGACAAGGGCGCTTCCGCCAGAGCTTCATCGAGCGGATGACCA  
 ACTTCGATAAGAACCTGCCCAACGAGAAGGTGCTGCCCAAGCACAGCCTGCTGTACGAGTACTTCACCGTGTATAACGAGCTGACCAAA  
 GTGAAATACGTGACCGAGGGAATGAGAAAAGCCCGCTTCTGAGCGGCAGCAGAAAAAGCCATCGTGGACCTGCTGTTCAAGACC  
 CCGAAAAGTGACCGTGAAGCAGCTGAAAAGAGGACTACTTCAAGAAAATCGAGTGTCTCGACTCCGTGGAAATCTCCGGCGTGAAGATC  
 GGTTCAACGCCTCCCTGGGCACATACCAGATCTGCTGAAAATATCAAGGACAAGGACTTCTTGACAATGAGGAAAAAGGAGACAT  
 CTGGAAGATACGTGACTGACCTGACCTGACCTGTTTTGAGGACAGAGATGATCGAGGAACCGCTGAAAACCTATGCCACCTGTTCTCAGCA  
 CAAAGTGTGAAGCTGCTGAAGCGCGGAGATACACCCGCTGGGGCAGGCTGAGCCGGAAGCTGATCAACGGCATCCGGGACAAGCAGT  
 CCGGCAAGACAACTCTGGATTTCTGAAAGTCCGACGGCTTCGCCAACAGAAAATTCATGCAGCTGATCCAGCAGCAGCCTGACCTTT  
 AAAGAGGACATCCAGAAAAGCCAGGTGTCCGGCCAGGGCGATAGCCTGCACGAGCACATTTGCCAATCTGGCCGGCAGCCCCGCCATTAA  
 GAAGGGCATCTTCAGACAGTGAAGGTGGTGGACGAGCTCGTGAAGTGTATGGGCCGGCACAAAGCCGAGAACATCGTGTATCGAAATGG  
 CCAGAGAGAACCAGACCACCCAGAAAGGACAGAAAGACAGCCGCGAGAGAAATGAAGCGGATCGAAGAGGGCATCAAAGAGCTGGGCAGC  
 CAGATCTGAAAAGAACCCCGTGGAAAAACCCAGCTGCAGAACGAGAAGCTGTACTGTACTACCTGCAGAAATGGGCGGGATATGTA  
 CGTGGACCAGGAACTGGACATCAACCGGCTGTCCGACTACGATGTGGACCATATCGTGCCTCAGAGCTTTCTGAAGGACGACTCCATCG  
 ACAACAAGGTGCTGACCAGAAGCGACAAGAACCAGGGCAAGAGCGACAACGTGCCCTCCGAAGAGGTCTGAAGAAGATGAAGAACTAC  
 TGGCGGCAGCTGCTGAACGCCAAGCTGATTACCCAGAGAAAGTTGACAACTGACCAAGGCCGAGAGAGGCGGCTGAGCGAACTGGA  
 TAAGGCCGGCTTCAATCAAGAGACAGCTGGTGGAAAACCCGGCAGATCAAAAAGCACGTGGCACAGATCCGGACTCCCGGATGAACACTA  
 AGTACGACGAGAATGACAAGCTGATCCGGGAAGTGAAGTGTATCACCCTGAAGTCCAAGCTGGTGTCCGATTTCCGGGAAGGATTTCCAG  
 TTTTACAAAAGTGCAGGAGATCAACAACCTACCACCACGCCACGACGCTACCTGAACGCGCTGTGGGAACCGCCCTGATCAAAAAGTA

CCCTAAGCTGGAAAGCGAGTTTCGTGTACGGCGACTACAAGGTGTACGACGTGCGGAAGATGATCGCCAAGAGCGAGCAGGAAATCGGCA  
AGGCTACCGCCAAGTACTTCTTCTACAGCAACATCATGAACTTTTTCAAGACCGAGATTACCCTGGCCAACGGCGAGATCCGGAAGCGG  
CCTCTGATCGAGACAAACGGCGAAACCGGGGAGATCGTGTGGGATAAGGGCCGGGATTTTTGCCACCGTGCAGGAAAGTGTCTGAGCATGCC  
CCAAGTGAATATCGTGAAAAAGACCGAGGTGCAGACAGGCGGCTTCAGCAAAGAGTCTATCCTGCCAAGAGGAACAGCGATAAGCTGA  
TCGCCAGAAAGAAGGACTGGGACCCTAAGAAGTACGGCGGCTTCGACAGCCCCACCGTGGCCTATTCTGTGTCTGGTGGTGGCCAAAGTG  
GAAAAGGGCAAGTCCAAGAACTGAAGAGTGTGAAAGAGCTGCTGGGGATCACCATCATGGAAAGAAGCAGCTTCGAGAAGAATCCCAT  
CGACTTTCTGGAAGCCAAGGGCTACAAAGAAGTAAAAAGGACCTGATCATCAAGCTGCCTAAGTACTCCCTGTTTCGAGCTGGAAAACG  
GCCGGAAGAGAATGCTGGCCTCTGCCGGCGAACTGCAGAAGGGAAACGAACTGGCCCTGCCCTCCAAATATGTGAACTTCCTGTACCTG  
GCCAGCCACTATGAGAAGCTGAAGGGCTCCCCGAGGATAATGAGCAGAAACAGCTGTTTTGTGGAACAGCACAAGCACTACCTGGACGA  
GATCATAGCAGCAGTACAGCGAGTTCTCCAAGAGAGTATCCTGGCCGACGCTAATCTGGACAAAGTCTGTCCGCCTACAACAAGCACC  
GGGATAAGCCCATCAGAGAGCAGGCCaAGAATATCATCCACTGTTTTACCCTGACCAATCTGGGAGCTCTGCCCTTCAAGTACTTT  
GACACCACCATCGACCGGAAGAGGTACACCAGCACAAAGAGGTGCTGGACGCCACCCTGATCCACCAGAGCATCACCGGCCTGTACGA  
GACACGGATCGACCTGTCTCAGCTGGGAGGCGACAGCCCCAAGAAGAAGAGAAAAGGTGGAGGCCAGCTAATAGGACCCAGCTTTCTTGT  
ACAAAGTGGTGACGTAAGCTAGCAGGATCTTTGTGAAGGAACCTTACTTCTGTGGTGTGACATAATTGGACAAACTACCTACAGAGATT  
TAAAGCTCTAAGGTAAATATAAAATTTTTAAGTGTATAATGTGTTAAACTACTGATTCTAATTGTTTGTGTATTTTAGATTCCAACCTA  
TGGAACTGATGAATGGGAGCAGTGGTGGAAATGCCTTTAATGAGGAAAACCTGTTTTGCTCAGAAGAAATGCCATCTAGTGATGATGAGG  
CTACTGCTGACTCTCAACATTCTACTCCTCAAAAAAGAAGAGAAAGGTAGttGACCCCAAGGACTTTCCCTCAGAATTGCTAAGTTTT  
TTGAGTCATGCTGTGTTTTAGTAATAGAACTCTTGCTTGCTTTGCTATTTACACCACAAAGGAAAAAGCTGCCTGCTATACAAGAAAAT  
TATGAAAAATATTCTGTAACCTTTATAAGTAGGCATAACAGTTATAATCATAACATACTGTTTTTTCTTACTCCACACAGGCATAGAG  
TGTCTGCTATTAATAACTATGCTCAAAAATTTGTGTACCTTTAGCTTTTTAATTTGTAAAGGGTTAATAAGGAATATTTGATGTATAGT  
GCCTTGACTAGAGATCATAATCAGCCATACCACATTTGTAGAGGTTTTACTTGCTTTAAAAAACCTCCACACCTCCCCCTGAACCTGA  
AACATAAAATGAATGCAATTGTTGTTGTTAACTTGTTTTATTGAGCTTATAATGGTTACAAATAAAGCAATAGCATCACAAATTTACAA  
AATAAAGCATTTTTTTTCACTGCATTCTAGTTGTGGTTTTGTCCAAACTCATCAATGTATCTTATCATGTCTGGATCCCGTTTTAACTACG  
CGTAATTCAAACAGGGTTCTGGCGTCTGTTCTCGTACTGTTTTCCCGAGGCCAGTGTCTTAGCGTTATTGAAAAAGGAAGAGTATGAGTA  
TTCAACATTTCCGTGTGCGCCTTATTCCCTTTTTTGCGGCATTTTGCTTCCCTGTTTTTGCTCACCCAGAAACGCTGGTGAAGTAAAA  
GATGCTGAAGATCAGTTGGGTGCACGAGTGGGTACATCGAACTGGATCTCAACAGCGGTAAGATCCTTGAGAGTTTTTCGCCCCGAAGA  
ACGTTTTCCAATGATGAGCACTTTTAAAGTTCTGCTATGTGGCGCGGTATTATCCCGTATTGACGCCGGGCAAGAGCAACTCGGTGCGC  
GCATACATAATTCTCAGAATGACTTGGTTGAGTACTACCAGTACAGAAAAGCATCTTACGGATGGCATGACAGTAAGAGAATTATGC  
AGTGCTGCCATAACCATGAGTGATAAACACTGCGGCCAACTTACTTCTGACAACGATCGGAGGACCGAAGGAGCTAACCGCTTTTTTTGCA  
CAACATGGGGGATCATGTAACCTGCCTTGATCGTTGGGAACCGGAGCTGAATGAAGCCATACCAAACGACGAGCGTGACACCACGATGC  
CTGTAGCAATGGCAACAACGTTGCGCAAACTATTAACCTGGCGAACTACTTACTCTAGCTTCCCGCAACAATTAATAGACTGGATGGAG  
GCGGATAAAGTTGCAGGACCCTTCTGCGCTCGGCCCTTCCGGCTGGCTGGTTTTATTGCTGATAAATCTGGAGCCGGTGAGCGTGGGTG  
TCGCGGTATCATTGCAGCACTGGGGCCAGATGGTAAGCCCTCCCGTATCGTAGTTATCTACACGACGGGGAGTCAGGCAACTATGGATG  
AACGAAATAGACAGATCGCTGAGATAGGTGCCTCACTGATTAAGCATTGGTAACTGTGACACCAAGTTTACTCATATATACTTTAGATT  
GATTTAAAACCTTCATTTTTAATTTAAAAGGATCTAGGTGAAGATCCTTTTTGATAATCTCATGACCAAAATCCCTTAACGTGAGTTTTT  
GTTCCACTGAGCGTCAGACCCCGTAGAAAAGATCAAAGGATCTTCTTGAGATCCTTTTTTTCTGCGGTAATCTGCTGCTTGCAACAA  
AAAAACCACCGCTACCAGCGGTGGTTTTGTTTCCGGATCAAGAGCTACCAACTCTTTTTCCGAAGGTAACCTGGCTTCAGCAGAGCGCAG  
ATACCAAATACTGTTCTTCTAGTGTAGCCGTAGTTAGGCCACCCTTCAAGAACTCTGTAGCACCGCTACATACCTCGCTCTGCTAAT  
CCTGTTACCAGTGGCTGCTGCCAGTGGCGATAAGTCGTGTCTTACCGGGTTGGACTCAAGACGATAGTTACCGGATAAGGCGCAGCGGT  
CGGGCTGAACGGGGGGTTCTGTGCACACAGCCCAGCTTGGAGCGAACGACCTACACCGAACTGAGATACCTACAGCGTGAGCTATGAGAA  
AGCGCCACGCTTCCCGAAGGGGAGAAAGGCGGACAGGTATCCGGTAAGCGGCAGGGTTCGGAACAGGAGAGCGCACGAGGGGAGCTTCCAGG  
GGGAAACGCTGGTATCTTTATAGTCTGTGCGGTTTTCCGCACCTCTGACTTGAGCGTCGATTTTTGTGATGCTCGTCAGGGGGGCGGA  
GCCTATGGAAAAACGCCAGCAACGCGGCCTTTTTACGGTTCCTGGCCTTTTTGCTGGCCTTTTTGCTCACATGTTCTTTTCTGCGTTATCC  
CCTGATTCTGTGGATAACCGTATTACCGCCTTTGAGTGTAGCTGATACCGCTCGCCGAGCCGAACGACCGAGCGCAGCGAGTCAAGTGTGAG  
CGAGGAAGCGGAAGA

pKRG3-mU6-Pub-hSpCas9-pAc

aac U6

BsmBI sites for sgRNA cloning

sgRNA tracrRNA and U6 terminator

aac Pub promoter

NLS

hSpCas9

T2A

pAc

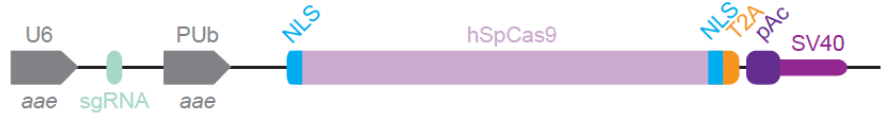

GCGCCCAATACGCAAACCGCCTCTCCCCGCGGGTTGGCCGATTTCATTAATGCAGGCAACTCGTGAAAGGTAGGCGGATCAGC**GAATGAA**  
**ATCGCCCATCGAGTTGATACGTCCATCCATCGCTAGAACC**CGCTTCGCTGTAGAAGACTATATAAGAGCAGAGGCAAGAGTAGT**GAAAT**  
**gGAGACGaCGTCTCt**gTTTTAGAGCTAGAAAATAGCAAGTTAAAATAAAGGCTAGTCCGTTATCAACTTGAAAAAGTGGCACCGAGTCGGT  
GCTTTTTTGTTTTAGAGCTAGAAATAGCAAGTTAAAATAAAGGCTAGTCCGTTTTTAGCGCTTGCGCCAATTCTGCAGACAAATGGCTAT  
CTTTACATGTAGCTTGTGCATTGAATCCAATTATAAATTTGCCTTGGCACCAGCTGAGCCAGACAAGAAAAGAAAGCTTCCCAGAATATA  
TCGATTTAGAAGGGTTGACGTCACTTGTCTGACTGCACATAACAGCAAATGATGCAATTAGAATGATTCAAGTGAAATTTCCAAATTAC  
TGATTTTTCTCTGGATTTGGTTATCAGATTACATTCGAAGCTAAGATTAGCTACCGAAAATTGTCGATCAAATCAGGAAATCCTTTCTCT  
ATCGAAAAGGCATTCGCACATCTTCTCTCTATGCCATATACACGAAGGGTAGGTACATTGACGTCTTTGCCAGAAGTTGAACTGCAT  
CGTTCAAGGTACAGAATGAACGACTAACAGACACAAGCACGTTTTGCTGTCCATTACAGACACAGGGATGGTACCCATATTCGATCGATA  
TAGAGCCATCCAACCGAACAGAGGTATATGTATGAATGTATTGCTGAAATTTCTAGAAGTACAACCACCTACGACAGTGTCTATAA  
AACGCCCTGCAAAGGCGAAACCAGCTCAATCGAATACGTTTCTAGTGGAGTGAACATTACGCGGCCCAAGTAAGCAGTGCCAGTGCA  
AGTGAAGTGAAGTCTCTAGTGA AAAAGAGTGATCCAATTAGCCAGAGGAGAAAATTTAGAGTGAACAAAGCTTTATTCAAAGGACAAT  
TACTATTAATTTGGTGAAGTGCATTTCCGTGAAGGGAATCTTCTAGTGAAGGTAGGTAAATTAATTGATGAAATTTATAGCTATGAGCG  
AAAAGTGGTGAAGTGCATTTCCGTGAAGGGAATCTTCTAGTGAAGGTAGGTAAATTAATTGATGAAATTTATAGCTATGAGCG  
AATTTGCAACGCAGTTTCATCATCATTGATAAAACCCAATTGTGATTACAGCGATAATCATATTTGTTGAATCATCGCTACTAATTG  
AATTAATTTCTAGAATAATAAGAATAACGTAATTTGCTCCGTACATATCTAAAATAAATATTTTGATGGTAATTACCCATTAAGGTAA  
TATTAACACATATCGAGAAAACCTTGAGGAAATCGTGAAAACCTTGAAGATACGCAATTTCAAACCTACGTAGTTCAAAGTGCAGAAAACA  
AGTTAATTTTCACTTAAAAGTAGGGCGTTGTTGTGACGTCATCACCTTCAAGTGTATATTTTCACTTGGCCTGCGACTGCAAACGCA  
GACAAAGCAAAAACAAGTTTAAAACCTGTCTGTCTGCTCGAAGCCAAAGGCAATGAATCAATATCAAATGAGAGTTTGCATTTACAA  
CCAATTACTCAAGCGTTTCTCTGTTTCTTTTCTGCTCAACAGAGATTTCAACACCAAGCTCGATAAGCTTGTTCGAATCTCGAGTGGC  
CGCTTCCGGAGGTATACACCTAGGCGGTACCCTGCAGTGAATTCGGAGCTCTACCGGTGCCACC**ATGGCCCCAAAGAAGAAGCGGAAG**  
**GTCCGTATCCACGGAGTCCCGACAGCC**GACAAGAAGTACAGCATCGGCCCTGGACCTCGGCACCAACTCTGTGGGCTGGGCCGTGAT**CA**  
**CGACGAGTACAAGGTGCCAGCAAGAAATTC**AAAGTGTCTGGGCAACCCGACCGGCACAGCATCAAGAAGAACCCTGATCGGAGCCCTGC  
TGTTTCGACAGCGGCGAAACAGCCGAGGCCACCCGGCTGAAGAGAACCAGCAGAAAGATACACCAGAGCGGAAGAACCAGCTGCTGCTAT  
CTGCAAGAGATCTTCAGCAACGAGATGGCCAAGGTGGACGACAGCTTCTTCCACAGACTGGAAGAGTCTTCTGTTGGAAGAGGATAA  
GAAGCAGAGCGGCACCCCATCTTCGGCAACATCGTGGACGAGGTGGCCTACCACGAGAAGTACCCACCATCTACCACCTGAGAAAAGA  
AACTGGTGGACAGCACCGACAAGGCCGACCTGCGGCTGATCTATCTGGCCCTGGCCACATGATCAAGTTCGGGGGCCACTTCTGATC  
GAGGGCGACCTGAACCCCGACAACAGCGACGTGGACAAGCTGTTTCATCCAGCTGGTGCAGACCTACAACCAGCTGTTTCGAGGAAAACCC  
CATCAACGCCAGCGGCGTGGACGCCAAGGCCATCTGTCTGCCAGACTGAGCAAGAGCAGACGGCTGGAAAATCTGATCGCCAGCTGC  
CCGGCGAGAAGAAGAATGGCCTGTTTCGAAACCTGATTGCCCTGAGCCTGGCCCTGACCCCAACTTCAAGAGCAACTTCGACCTGGCC  
GAGGATGCCAAACTGCAGCTGAGCAAGGACACCTACGACGACGACCTGGACAACCTGCTGGCCAGATCGGCGACCAGTACGCCGACCT  
GTTTCTGGCCGCAAGAACCTGTCCGACGCCATCTGCTGAGCGACATCTGAGAGTGAACACCGAGATCACAAGGCCCCCTGAGCG  
CCTCTATGATCAAGAGATACGACGAGCACCACCAGGACCTGACCCTGCTGAAAGCTCTCGTGCAGCAGCAGCTGCCTGAGAAGTACAAA  
GAGATTTTCTTCGACCAGAGCAAGAACGGCTACGCCGGCTACATTGACGGCGGAGCCAGCCAGGAAGAGTTCTACAAGTTCATCAAGCC  
CATCCTGGAAAAGATGGACGGCACCGAGGAAGTCTCGTGAAGCTGAACAGAGAGGACCTGCTGCGGAAGCAGCGGACCTTCGACAACG  
GCAGCATCCCCACCAGATCCACCTGGGAGAGCTGCACGCCATTCTGCGGCGGCAGGAAGATTTTACCATTCTGAAGGACAACCGG  
GAAAAGATCGAGAAGATCCTGACCTTCCGCATCCCCTACTACGTGGGCCCTCTGGCCAGGGGAAACAGCAGATTCGCCTGGATGACCAG  
AAAGAGCGAGGAAACCATCACCCCTGGAACCTCGAGGAAGTGGTGGACAAGGGCGCTTCCGCCAGAGCTTCATCGAGCGGATGACCA  
ACTTCGATAAGAACCTGCCAACGAGAAGGTGCTGCCAACGACAGCCTGCTGTACGAGTACTTCACCGTGTATAACGAGCTGACCAA  
GTGAAATACGTGACCGAGGGAATGAGAAGCCCGCTTCTGAGCGGCGAGCAGAAAAGGCCATCGTGGACCTGCTGTTCAAGACCAA  
CCGGAAGTGAACCTGAGCAGCTGAAAGAGGACTACTTCAAGAAAATCGAGTCTCGACTCCGTGGAAAATCTCCGGCGTGAAGATC  
GGTTCAACGCCTCCCTGGGCACATACCAGACTGCTGAAAATTTATCAAGGACAAGGACTTCTGGACAATGAGGAAAACGAGGACATT  
CTGGAAGATATCGTGTGACCCTGACACTGTTTGGAGCAGAGAGATGATCGAGGAACGGCTGAAAACCTATGCCACCTGTTTCGACGA  
CAAAGTGATGAAGCAGCTGAAGCGGCGGAGATACACCGCTGGGGCAGGCTGAGCCGGAAGCTGATCAACGGCATCCGGGACAAGCAGT  
CCGGCAAGACAATCCTGGATTTCTGAAGTCCGACGGCTTCGCCAACAGAAAATTCATGCAGCTGATCCACGACGACAGCCTGACCTTT  
AAAGAGGACATCCAGAAAGCCCAGGTGTCCGGCCAGGGCGATAGCCTGCACGAGCACATTCGCAATCTGGCCGGCAGCCCCGCCATTAA  
GAAGGGCATCCTGCAGACAGTGAAGGTGGTGGACGAGCTCGTGAAGTGTGGGCCGGCACAAGCCGAGAACATCGTGTGAAATGG  
CCAGAGAGAACCAGACCACCCAGAAGGGACAGAAGAACAGCCGCGAGAGAATGAAGCGGATCGAAGAGGGCATCAAAGAGCTGGGCAGC  
CAGATCCTGAAAGAACACCCCGTGGAAAACACCCAGCTGCAGAACGAGAAGCTGTACTTACTTGCAGAATGGGCGGGATATGTA  
CGTGGACCAGGAAGTGGACATCAACCGGCTGTCCGACTACGATGTGGACCATATCGTGCCTCAGAGCTTTCTGAAGGACGACTCCATCG  
ACAACAAGGTGCTGACCAGAAGCGACAAGAACCAGGGCAAGAGCGACAACGTGCCCTCCGAAGAGGTGCTGAAGAAGATGAAGAAGTAC  
TGGCGGCGAGCTGCTGAACGCCAAGCTGATTACCCAGAGAAAAGTTCGACAATCTGACCAAGGCCGAGAGAGGCGGCCCTGAGCGAAGTGG  
TAAGGCCGGCTTCATCAAGAGACAGCTGGTGGAAAACCCGGCAGATCACAAGCAGCTGGCACAGATCCTGGACTCCCGGATGAACACTA

AGTACGACGAGAATGACAAGCTGATCCGGGAAGTGAAAGTGATCACCTGAAGTCCAAGCTGGTGTCCGATTTCCGGAAGGATTTCCAG  
TTTTACAAAGTGC GCGAGATCAACA ACTACCACCAGCCCACGACGCTACCTGAACGCCGTCGTGGGAACCGCCCTGATCAAAAAGTA  
CCCTAAGCTGGAAAGCGAGTTCTGTACGGCGACTACAAGGTGTACGACGTGCGGAAGATGATCGCCAAGAGCGAGCAGGAAATCGGCA  
AGGCTACCGCCAAGTACTTCTTCTACAGCAACATCATGAACTTTTTCAAGACCGAGATTACCCTGGCCAACGGCGAGATCCGGAAGCGG  
CCTCTGATCGAGACAAACGGCGAAACCGGGGAGATCGTGTGGGATAAGGGCCGGGATTTTGCACCCTGCGGAAAGTGCTGAGCATGCC  
CCAAGTGAATATCGTGAAAAAGACCGAGGTGCAGACAGGCGGCTTCAGCAAAGAGTCTATCCTGCCAAGAGGAACAGCGATAAGCTGA  
TCGCCAGAAAGAAGGACTGGGACCCTAAGAAGTACGGCGGCTTCGACAGCCCCACCCTGGCCTATTCTGTGCTGGTGGTGGCCAAAGTG  
GAAAAGGGCAAGTCCAAGAACTGAAGAGTGTGAAAGAGCTGCTGGGGATCACCATCATGGAAAGAAGCAGCTTCGAGAAGAATCCCAT  
CGACTTTCTGGAAGCCAAGGGCTACAAAGAAGTAAAAAGGACCTGATCATCAAGCTGCCTAAGTACTCCCTGTTTCGAGCTGGAAAACG  
GCCGGAAGAGATGTGGCCTCTGCCGGCGAAGTGCAGAAGGGAACGAACTGGCCCTGCCCTCCAAATATGTGAACCTCCCTGTACCTG  
GCCAGCCACTATGAGAAGCTGAAGGGCTCCCCGAGGATAATGAGCAGAAACAGCTGTTTTGTGGAACAGCACAAGCACTACTGGACGA  
GATCATCGAGCAGATCAGCGAGTTCTCCAAGAGAGTGATCCTGGCCGACGCTAATCTGGACAAAGTGCTGTCCGCTACAACAAGCACC  
GGGATAAGCCATCAGAGAGCAGGCCaAGAATATCATCCACCTGTTTACCCTGACCAATCTGGGAGCCCCTGCCGCCTTCAAGTACTTT  
GACACCACCATCGACC GGAAGAGGTACACCAGCACCAAAGAGGTGCTGGACGCCACCCTGATCCACCAGAGCATCACCGCCTGTACGA  
GACACGGATCGACCTGTCTCAGCTGGGAGGCGACAAAAGGCCGGCGCCACGAAAAAGGCCGGCCAGGCAAAAAAGAAAAAGGGATCAG  
GCAAGCTTGAGGGCAGAGGAAGTCTTCTAACATGCGGTGACGTGGAGGAGAATCCCGGCCCTGCTAGCGGTAGCGGCAGCGGTAGCATG  
ACCGAGTACAAGCCACGGTGCCTCGCCACCCGCGACGACGTCCCCGGGCGTACGCACCCTCGCCGCGCGGTTTCGCCGACTACCC  
CGCCACGCGCCACACCGCTCGACCCGACCGCCACATCGAGCGGGTACCAGCTGCAAGA ACTCTTCTCACGCGCGTTCGGGCTCGACA  
TCGGCAAGGTGTGGGTTCGCGGACGACGGCGCCGCGGTGGCGGTCTGGACCACGCCGGAGAGCGTCAAGCGGGGGCGGTGTTTCGCCGAG  
ATCGGCCCGCGCATGGCCGAGTTGAGCGGTTCCCGGCTGGCCGCGCAGCAACAGATGGAAGGCCTCCTGGCGCCGACCCGGCCCAAGGA  
GCCCCGCGTGGTTCTGGCCACCCTCGGCGTCTCGCCGACCACCAGGGCAAGGGTCTGGGCAGCGCCGTCGTGCTCCCCGGAGTGGAGG  
CGGCCGAGCGCGCCGGGTGCCCGCTTCTGGAGACCTCCGCGCCCCGCAACCTCCCCTTCTACGAGCGGCTCGGCTTACCCTGACC  
GCCGACGTCGAGGTGCCCGAAGGACCGCGCACCTGGTGCATGACCCGCAAGCCCGGTGCC TAATAGGACCCAGCTTTCTTGTACAAAGT  
GGTGACGTAAGCTAGCAGGATCTTTGTGAAGGAACCTTACTTCTGTGGTGTGACATAATTGGACAAACTACCTACAGAGATTTAAAGCT  
CTAAGGTAAATATAAAATTTTAAAGTGTATAATGTGTTAAACTACTGATTCTAATTGTTTGTGTATTTTAGATTCCAACCTATGGAAC  
GATGAATGGGAGCAGTGGTGGAAATGCCTTTAATGAGGAAAACCTGTTTTGCTCAGAAGAAATGCCATCTAGTGATGATGAGGCTACTGC  
TGACTCTCAACATTCTACTCCTCAAAAAAGAAGAGAAAGGTAGtGACCCCAAGGACTTTCTTCCAGAATTGCTAAGTTTTTTGAGTC  
ATGCTGTGTTTAGTAATAGA ACTCTTGCTTGCTTTGCTATTTACACCACAAAGGAAAAAGCTGC ACTGCTATAACAAGAAAATTATGGAA  
AAATATTCTGTAACCTTTATAAGTAGGCATAACAGTTATAATCATAACATACTGTTTTTTCTTACTCCACACAGGCATAGAGTGTCTGC  
TATTAATAACTATGCTCAAAAATTGTGTACCTTTAGCTTTTTAATTTGTAAGGGGTTAATAAGGAATATTTGATGTATAGTGCCTTGA  
CTAGAGATCATAATCAGCCATAACACATTTGTAGAGGTTTTACTTGCTTTAAAAAACCTCCACACCTCCCCCTGAACCTGAAACATAA  
AATGAATGCAATTGTTGTTGTTAACTTGTATTATGCAGCTTATAATGGTTACAAATAAAGCAATAGCATCACAAATTTACAAATAAAG  
CATTTTTTTTACTGCATTCTAGTTGTGGTTTTGTCCAAACTCATCAATGTATCTTATCATGTCTGGATCCCCTTTAAACTACGCGTAATT  
CAAACAGGGTTCTGGCGTCGTTCTCGTACTGTTTTCCCCAGGCCAGTGCTTTAGCGTTATTGAAAAAGGAAGAGTATGAGTATTCAACA  
TTTTCCGTGTCGCCCTTATTCCCTTTTTTGCGGCATTTTGCCTTCTGTTTTTGTCTACCCAGAAACGCTGGTGAAGTAAAAGATGCTG  
AAGATCAGTTGGGTGCACGAGTGGGTTACATCGAACTGGATCTCAACAGCGGTAAGATCCTTGAGAGTTTTCGCCCCGAAGAAGTTTTT  
CCAATGATGAGCACTTTTAAAGTCTGCTATGTGGCGCGGTATTATCCCGTATTGACGCCGGCAAGAGCAACTCGGTTCGCCGCATACA  
CTATTCTCAGAATGACTTGGTTGAGTACTCACCAGTACAGAAAAGCATCTTACGGATGGCATGACAGTAAGAGAATTATGCAGTGTCTG  
CCATAACCATGAGTGATAACACTGCGGCCAACTTACTTCTGACAACGATCGGAGGACCGAAGGAGCTAACCCTTTTTTGCACAACATG  
GGGGATCATGTAACCTGCCTTGATCGTTGGGAACCGGAGCTGAATGAAGCCATACCAAACGACGAGCGTGACACCACGATGCCTGTAGC  
AATGGCAACAACGTTGCGCAAACTATTA ACTGGCGAACTACTTACTCTAGCTTCCC GGCAACAATTAATAGACTGGATGGAGGCGGATA  
AAGTTGCAGGACC ACTTCTGCGCTCGGCCCTTCCGGCTGGCTGGTTTTATTGCTGATAAATCTGGAGCCGGTGAGCGTGGGTCTCGCGGT  
ATCATTGCAGCACTGGGGCCAGATGGTAAGCCCTCCCGTATCGTAGTTATCTACACGACGGGGAGTCAGGCAACTATGGATGAACGAAA  
TAGACAGATCGCTGAGATAGGTGCCTCACTGATTAAGCATTGGTAACTGTGACACCAAGTTTACTCATATATACTTTAGATTGATTTAA  
AACTTCATTTTTAATTTAAAAGGATCTAGGTGAAGATCCTTTTTGATAATCTCATGACCAAAATCCCTTAACGTGAGTTTTCTGTTCCAC  
TGAGCGTCAGACCCCGTAGAAAAGATCAAAGGATCTTCTTGAGATCCTTTTTTCTGCGCGTAATCTGCTGCTTGCAAAACAAAAAAC  
ACCGCTACCAGCGGTGGTTTTGTTTTGCCGGATCAAGAGCTACCAACTCTTTTTCCGAAGGTA ACTGGCTTCAGCAGAGCGCAGATACCAA  
ATACTGTTCTTCTAGTGTAGCCGTAAGTTAGGCCACC ACTTCAAGAACTCTGTAGCACC GCCTACATACTCGCTCTGCTAATCCTGTTA  
CCAGTGGCTGCTGCCAGTGGCGATAAGTCTGTCTTACC GGGTTGGACTCAAGACGATAGTTACC GGATAAGGCGCAGCGGTTCGGGCTG  
AACGGGGGGTTTCGTGCACACAGCCAGCTTGGAGCGAACGACCTACACCGAACTGAGATACCTACAGCGTGAGCTATGAGAAAGCGCCA  
CGCTTCCCGAAGGGAGAAAGGCGGACAGGTATCCGGTAAGCGGCAGGGTCGGAACAGGAGAGCGCACGAGGGAGCTTCCAGGGGGAAAC  
GCCTGGTATCTTTATAGTCTGTGCGGTTTTCGCCACCTCTGACTTGAGCGTCGATTTTTTGTGATGCTCGTCAGGGGGGCGGAGCCTATG  
GAAAAACGCCAGCAACGCGGCCCTTTTTACGGTTCTTGGCCTTTTTGCTGGCCTTTTTGCTCACATGTTCTTCTGCGTTATCCCCTGATT  
CTGTGGATAACCGTATTACC GCCTTTGAGTGTAGCTGATAACCGCTCGCCGACGCCGAACGACCGAGCGCAGCGAGTCACTGAGCGAGGAA  
CGGGAAGA

pSL1180-HR-Aag2-loxP-Pub-RFP-loxP-3XFLAG-AGO1

AGO1 homology with silent mutations at sgRNA cleavage sites

loxP sites

aae PUb promoter

RFP

3xFLAG

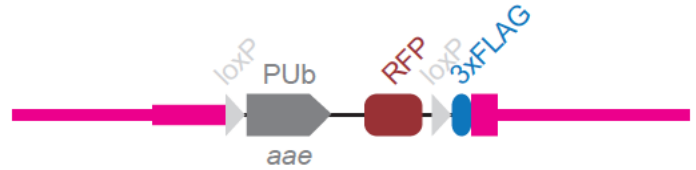

GCGCCCAATACGCAAACCGCCTCTCCCCGCGCGTTGGCCGATTTCATTAATGCAGCTGGCACGACAGGTTTTCCCGACTGGAAAGCGGGCA  
 GTGAGCGCAACGCAATTAATGTGAGTTAGCTCACTCATTAGGCACCCCAGGCTTTACACTTTATGCTTCCGGCTCGTATGTTGTGTGGA  
 ATTGTGAGCGGATAACAATTTACACAGGAAACAGCTATGACCATGATTACGAATTCGACATGTAGGACATGTGGGGTAGTTCAGAAA  
 TCCAGATAAACGATGGACATTTGAATTATCCCCAAACCTCCATCATGTTCTGTACTTGATATCAACTCAAGGAACCCCGCACTAAAT  
 TGAATTTTCATGGCTACTATGATAACCGTGTAAACCGTTTTCTAAAAGTTTCTGTGCGATGACTCGTTACAAATGACGTTACAAATCTA  
 TAATTTCTATAAATCCCTTCAAATGACTCTTGAAATTTATCTGTATTAATAATATAAATATTTTAAAAGCTGGTAAATCACCAA  
 CATTTTGACATCCATTTATCCAGAATCGTCTATTGTTTTATGCGGTGAATGCCGAAAATAATACCTTCAATGATTCATTGCCGATG  
 TTTCACTGAATCAAACCTCAGAAATGAAATTTACGCATTTAGATAGACTACTCTTTTTTTTTCAGAGTTTTAGTTTACAGCAAAG  
 ATAAAAGGTAATTCAAATGAGAGCTGCTGTAGAAAAGTTTCTCGCTCAATGTATGATCTCGCCTTAAAGCCATTGGTAACCAAGTGTGTA  
 GCTTGTGTTACTACGCAAACGAATGGATTTACACGTTACTTAAAAATGCTACAATGAAGATTCTCTATCTCCCAGTGGCGATAGTTAT  
 ATTTTGGTCCATTCATTTGCTTAAAAACAACGAGCTACACATCAATGGCTTTTAGATCGAGATCACAATTTATGCGAGATTTCTCAAG  
 TAATTTATTGCCAAGAAATTTCTGTGAATAATAATAATTATAATGATTATTCTGTTTCATGAGCGCATCCATTTTGGAGCGTCCGTA  
 TGAACAAAACCGTAAACCGCAACCTGGCTGTTTACTTGCAGCGTTTTTTCGGTACCTAAACTTGCCTACAAGTCAACTCGTCTAAAA  
 CATAACGCCTACCCAGGCTGCTGGTAGCGAAACGTTGGGGGGCGATGAAGAAAATTTGTCTCACTCGCCATCATAACGAGATTTCCGGA  
 CGAGTTCAGCAGACGTGCGTGTGTTAGCGCGACGACGAAAAGTGCAAAATTCGGCCGTAATTAGTTCGCTTCCGTTTTTCCGAGTGCCT  
 CCGATCGTTAGCGGACCGTTCGGGGTGTGATTTAAGCGTGAAAATAACTTCGTATAATGTATGCTATACGAAGTTATATCTTTTACATG  
 TAGCTTGTGCATTGAATCCAATTATAATTTGCCTTGGCACCAGCTGAGCCAGACAAGAAAAGAAAGCTTCCAGAAGTATATCGATTTAG  
 AAGGGTTGACGTCACCTTGCTGACTGACTAATACAGCAAATGATGCAATTAGAATGATTCAAGTGAATTTCCCAAATTAATGATTTTCT  
 TCTGGATTTGGTTATCAGATTACATTCGAAGCTAAGATTAGCTACCGAAATTTGTCGATCAAATCAGGAAATCCTTTCTCTATCGAAAA  
 GGCATTCGCACATCTTCTCTCTATGCCATATACACGAAGGGTAGGTACATTGACGCTTTTGCCAGAAGTTGAACTGCATCGTTCAAGG  
 TACAGAATGAACGACTAACAGACACAAGCACGTTTTGCTGTCCATTAGACACAGGGATGGTACCCATATTCGATCGATATAGAGCCAT  
 CCAACCGAACAGAGGTATATGTATGAATGTATTGCTGAAATTTTCTAGAAGTACAACCACCACACTACGACAGTGTCTATAAAACGCCCC  
 GCAAAGGCGAAACAGCTCAATCGAATACGTTTCTAGTGGAGTGAACATTACGCGGCCAAAGTAAGCAGTGCCAGTGAAGTGAAGTGA  
 AAGTCTCTAGTGAAAAAGAGTATCAATTAGCCAGAGGAGAAAATTTAGAGTGAACAAAGCTTTATTTCAAAGGACAATTAATTAATA  
 ATTTGTTGAAAGTGCATTTTCGGTGAAGGGAATCTTCTAGTGAAGGTAGGTAATTAATGATGAAATTTATAGCTATGACGCAAGGAACT  
 TTGGTGAATGATTCCTTTGCTTTGAATGAGCAAACCTATTTTCCAAGATGGCGACTATTGAGCTTTGAGTATTAGTGAATAATTTGCAA  
 CGCAGTTTTCATCATCATTGATAAAACCAATTTGTGATTCACAGCGATAATCATATTTCTGTTGAATCATCGCTACTAATTGAATTAATAAT  
 TCTAGAATAATAAGAATAACGTATTTGCTCCGTCACATATCTAAAATAAATAATTTTGTAGGTAATTACCCATTAAGGTAATATTAACAC  
 ATATCGAGAAAAACCTTGAGGAAATCGTGAACACTTGAAGATACGCAATTTCAAACACTACGTAGTTCAAAGTCGAAAAACAAGTTAATTT  
 TTCACTTAAAAGTAGGGCGTTGTTGTGACGTCATCACCTTCAAGTGTATATTTTCACTTGGCCTGCGACTGCAAACGACAGACAAAGCA  
 AAACAAGTTTTAAAACCTGTGCTGCTGCTCGAAGCCAAAGGCAATGAATCAATATCAAATGAGAGTTTGCATTTTACAACCAATTAAT  
 CAAGCGTTTCTCGTTTCTTTTTCTGCTCAACAGAGATTTCAACACCAAGCTCGATAAGCTTGTTCGAATCTCGAGTGCAGCGCTTCCGG  
 AGGTATACACCTAGGCGGTACCCTGCAGTGAATTCGGAGCTCTACCGCGGCCGATGAGCGAGCTGATCAAGGAGAATGCACATGA  
 AGCTGTACATGGAGGGCACCGTGAACAACCACCCTTCAAGTGCACATCCGAGGGCGAAGGCAAGCCCTACGAGGGCACCCAGACCATG  
 AAGATCAAGGTGGTTCGAGGGCGGCCCTCTCCCCTTCGCCTTCGACATCCTGGCTACCAGCTTCATGTACGGCAGCAAAGCCTTCATCAA  
 CCACACCCAGGGCATCCCCGACTTCTTTAAGCAGTCTTCCCTGAGGGCTTCACATGGGAGAGAATCACCACATACGAAGACGGGGGGC  
 TGCTGACCGCTACCCAGGACACCAGCTTCCAGAACGGCTGCATCATCTACAACGTCAAGATCAACGGGGTGAACCTCCCATCCAACGGC  
 CCTGTGATGCAGAAGAAAACACGCGGCTGGGAGGCCAACCCGAGATGCTGTACCCCGCTGACGGCGGCCCTGAGAGGCCACAGCCAGAT  
 GGCCCTGAAGCTCGTGGGCGGGGGCTACCTGCACTGCTCCTTCAAGACCACATACAGATCCAAGAAACCCGCTAAGAACCTCAAGATGC  
 CCGGCTTCCACTTCGTGGACCACAGACTGGAAGAATCAAGGAGGCCGACAAAGAGACCTACGTCGAGCAGCAGAGATGGCTGTGGCC  
 AAGTACTGCGACCTCCCTAGCAAACCTGGGCGACAGATAATTAATTAATAACTTCGTATAATGTATGCTATACGAAGTTATATGGATTAC  
 AAGGATCACGATGGAGATTACAAGGATCACGATATCGATTACAAGGATGATGATAAGTATCCGGTGGTCAACGTAAGTACCGTTTCCG  
 GACGTTTTGAAAAAGTGAATTTACAAGAGAAGAAAAAAGAAAGTGTGCGAGGGGACCTTCTTCTCCCTCTCGTCTCTCTCGCTG  
 TGTAATAATTTCTTCCCCATGTGTGTAATTTTCTGCGCTGCTGCTGTTTTGGTGTCTTCTCTGGACGTTTTTGTGCGTGTGcGTTGG  
 TGTGATGGGGGGTTTTCTGTGTACGGACGAAGAATTTGTGTGCGGTGTGCGTGTGAGATGAGGCCCTCGCCAGAATGAAAATAAACC  
 TCATCAACAATGAAAAGTGTACCCTTTATGGAATAAAAAACGTTTTTATGCAGAAGAGCATGTGAATTATGTATCACTTGGCGATGG  
 AATTGGGAACATTGATGCTTCCGGACCGATGGAATAATGGAAAACAGATGTTTTCTGCACGTTCTTTGGCACCTTGGCAATGTGTACTA  
 ATCAACACCTCCCTCGAAAAATATACTTGGTGTATCAGAATGTTTTGTGTTTTGTGAATAGTAGGTAGTTTTCCGTGTGTGGGTGTGTGCTT  
 TGCTAATCATCTGCTCCAGAAAAAAGGAAAACCAATTTTAATCATCATTTTCTGCGGCTTCGGAGACTGATAAGAGGAATACAA  
 CTGTTTTGCAAACAGTGGATTGAAAACAATGGATAGAAGTTTTATTGGTTCACTTCAGTTCTAAACAGCGGATCCATCTGAAAAGTTATA  
 TGAATTTGATACCCCTTTTTCACTGCTGGGAAATTTATGCTTTTTGTGTCGCTCTTTGCTCACAACACTACATACGGAGATGCAGACAGAGC  
 TCGCATTATGTTGGTGGTGTCTGTGCTGCGCCATCCGAGAATCGGAAACATCGTGCAGGATGGAACATGGAAGAAGAGGACGTTGTAGG  
 GTTTTACCATTATGTATATGCGTTTCAAGGCGACATCAGACGAGGTGGGTCTTCTCGAAATGATGGGTGGTTGACTGAGTAGCACCTGCTGT  
 TCATGTGCGGAAATGGAATAACGTGGAGATGCAATGTTCTTCAACGCTAGAAGGATTCGGGGAGACGAAAAGCAAATCCGGTGGCGGCC  
 GCCTGCAGCTGGCGCCATCGATACGCGTACGTCGCGACCGCGGACATGTACAGAGCTCGAGAAGTACTAGTGGCCACGTGGGCGCGTGA



CCTTAAGCTTGGCACTGGCCGTCGTTTTACAACGTCGTGACTGGGAAAACCCCTGGCGTTACCCAACCTTAATCGCCTTGCAGCACATCCC  
CCTTTTCGCCAGCTGGCGTAATAGCGAAGAGGCCCGCACCGATCGCCCTTCCCAACAGTTGCGCAGCCTGAATGGCGAATGGCGCCTGAT  
GCGGTATTTTTCTCCTTACGCATCTGTGCGGTATTTACACCCGCATACGTCAAAGCAACCATAGTACGCGCCCTGTAGCGGGCGCATTAAAG  
CGCGGCGGGTGTGGTGGTTACGCGCAGCGTGACCGCTACACTTGCCAGCGCCCTAGCGCCCGCTCCTTTTCGCTTTCTTCCCTTCCCTTC  
TCGCCACGTTTCGCCGGCTTTCCCGCTCAAGCTCTAAATCGGGGGCTCCCTTTAGGGTTCGGATTTAGTGCTTTACGGCACCTCGACCCC  
AAAAAATTGATTTGGGTGATGGTTCACGTAGTGGGCCATCGCCCTGATAGACGGTTTTTCGCCCTTTGACGTTGGAGTCCACGTTCTT  
TAATAGTGGACTCTTGTTCCAAACCTGGAACAACACTCAACCCTATCTCGGGCTATTCTTTTGATTTATAAGGGATTTTGCCGATTTTCGG  
CCTATTGGTTAAAAAATGAGCTGATTTAACAAAAATTTAACGCGAATTTTAAACAAAATATTAACGTTTACAATTTTATGGTGCACCTCTC  
AGTACAATCTGCTCTGATGCCGCATAGTTAAGCCAGCCCCGACACCCGCCAACACCCGCTGACGCGCCCTGACGGGCTTGTCTGCTCCC  
GGCATCCGCTTACAGACAAGCTGTGACCGTCTCCGGGAGTGCATGTGTGACAGGTTTTTACCCGTCATCCGAAACGCGCGAGACGAA  
AGGGCCTCGTGATACGCCTATTTTTATAGGTTAATGTGCATGATAATAATGGTTTTCTTAGACGTCAGGTGGCACTTTTCGGGGAAATGTG  
CGCGGAACCCCTATTTGTTTTATTTTTCTAAATACATTCAAATATGTATCCGCTCATGAGACAATAACCCTGATAAATGCTTCAATAATA  
TTGAAAAGGAAGAGTATGAGTATTCAACATTTCCGTGTGCGCCCTTATTCCCTTTTTTTCGGGCATTTTGCCTTCCCTGTTTTTGTCC  
CAGAAACGCTGGTGAAAGTAAAAGATGCTGAAGATCAGTTGGGTGCACGAGTGGGTTACATCGAACTGGATCTCAACAGCGGTAAGATC  
CTTGAGAGTTTTTCGCCCGAAGAACGTTTTTCCAATGATGAGCACTTTTAAAGTTCTGCTATGTGGCGCGGTATTATCCCGTATTGACGC  
CGGGCAAGAGCAACTCGGTGCGCGCATACACTATTCTCAGAATGACTTGGTTGAGTACTCACCAGTCACAGAAAAGCATCTTACGGATG  
GCATGACAGTAAGAGAATTATGCAGTGTGCCATAACCATGAGTGATAAACTGCGGCCAACTTACTTCTGACAACGATCGGAGGACCG  
AAGGAGCTAACCGCTTTTTTGCACAACATGGGGGATCATGTAACCTCGCCTTGATCGTTGGGAACCGGAGCTGAATGAAGCCATACCAA  
CGACGAGCGTGACACCACGATGCCTGTAGCAATGGCAACAACGTTGCGCAAACCTATTAACCTGGCGAACTACTTACTCTAGCTTCCCGGC  
AACAATTAATAGACTGGATGGAGGCGGATAAAGTTGAGGACCACTTCTGCGCTCGGCCCTTCCGGCTGGCTGGTTTTATTGCTGATAAA  
TCTGGAGCCGGTGTAGCGTGGGTCTCGCGGTATCATTGCAGCACTGGGGCCAGATGGTAAGCCCTCCCGTATCGTAGTTATCTACACGAC  
GGGGAGTCAGGCAACTATGGATGAACGAAATAGACAGATCGCTGAGATAGGTGCCTCACTGATTAAGCATTGGTAACCTGTGACACCAAG  
TTTACTCATATATACTTTAGATTGATTTAAAACCTTCATTTTTAATTTAAAAGGATCTAGGTGAAGATCCTTTTTTGATAATCTCATGACC  
AAAATCCCTTAACGTGAGTTTTTCGTTCCACTGAGCGTCAGACCCCGTAGAAAAGATCAAAGGATCTTCTTGAGATCCTTTTTTTCTGCG  
CGTAATCTGCTGCTTGCAAACAAAAAAACCACCGCTACCAGCGGTGGTTTTGTTTTGCCGGATCAAGAGCTACCAACTCTTTTTCCGAAGG  
TAACTGGCTTCAGCAGAGCGCAGATACCAAATACTGTTCTTCTAGTGTAGCCGTAGTTAGGCCACCACTTCAAGAACTCTGTAGCACCG  
CCTACATACCTCGCTCTGCTAATCCTGTTACCAGTGGCTGCTGCCAGTGGCGATAAGTCGTGTCTTACCGGGTTGGACTCAAGACGATA  
GTTACCGGATAAAGGCGCAGCGGTCCGGCTGAACGGGGGTTTCGTGCACACAGCCAGCTTGGAGCGAACGACCTACACCGAACTGAGAT  
ACCTACAGCGTGAGCTATGAGAAAAGCGCCACGCTTCCCGAAGGGAGAAAGGCGGACAGGTATCCGGTAAGCGGCAGGGTCGGAACAGGA  
GAGCGCACGAGGGAGCTTCCAGGGGAAACGCCTGGTATCTTTATAGTCTGTGCGGTTTTCGCCACCTCTGACTTGAGCGTCGATTTTT  
GTGATGCTCGTCAGGGGGCGGAGCCTATGGAAAACGCCAGCAACGCGGCCTTTTTACGGTTCCTGGCCTTTTGTGGCCTTTTGTCTC  
ACATGTTCTTTCCCTGCGTTATCCCCTGATTCTGTGGATAACCGTATTACCGCCTTTGAGTGAGCTGATACCGCTCGCCGCAGCCGAACG  
ACCGAGCGCAGCGAGTCAGTGAGCGAGGAAGCGGAAGA
